# Supplementary material for: Phosphoregulation accommodates Type III secretion and assembly of a tether of ER-Chlamydia inclusion membrane contact sites
Source: eLife. 2022 Jul 15;11:e74535. doi: 10.7554/eLife.74535 (PMC9286742; doi:10.7554/eLife.74535)
Supplement: Figure 2—source data 1. [file elife-74535-fig2-data1.xlsx]

## Sheet: Figure 2B
	aFLAG (IncV)	Ponceau (GST)
Lane 1	0	3976.67
Lane 2	0	2408.89
Lane 3	10143.4	3730.84
Lane 4	345.849	3164.01

## Sheet: Figure 2D
	aMBP (VAP)	Ponceau (GST)
Lane 1	0	0
Lane 2	0	0
Lane 3	30.536	7854.55
Lane 4	53.364	7923.57
Lane 5	222.799	898.749
Lane 6	4829.67	1405.82
