# Supplementary material for: Phosphoregulation accommodates Type III secretion and assembly of a tether of ER-Chlamydia inclusion membrane contact sites
Source: eLife. 2022 Jul 15;11:e74535. doi: 10.7554/eLife.74535 (PMC9286742; doi:10.7554/eLife.74535)
Supplement: Figure 3—figure supplement 1—source data 1. [file elife-74535-fig3-figsupp1-data1.xlsx]

## Sheet: Figure 3S1
	IncV Volume				Inclusion Volume
CX-4945 µM	0	0.625	10		0	0.625	10
	31.4	22.8	11.6		102	98.2	33.2
	42.1	29.5	67.2		126	110	250
	5.83	31.3	40.7		20.9	101	162
	35.3	20.7	52.3		121	43.4	122
	133	15.8	57.2		401	74.1	189
	40.8	17.4	86.7		110	58.5	482
	35.8	75.8	61.9		104	163	188
	23.9	12.2	99.6		51.1	40.3	409
	15.5	26.2	8.19		32.9	113	24.1
	28.6	13.7	15.3		73.8	63.4	35.3
	18.3	38.5	31.2		92.8	103	85.7
	32.9	34.9	50.6		102	114	157
	38	14.7	29.4		125	100	72.3
	51.3	19.5	40.4		159	65.8	106
	60.1	65.4	42.5		154	306	187
	29.9	17.4	46.3		105	70.9	123
	42.9	96.2	62.2		127	324	274
	7.38	14.6	92.3		21.4	39.5	343
	39.9	7.68	74.9		122	22.2	227
	127	32.5	65.6		407	75	341
	60.4	42.5	48.6		205	85.7	147
	49.2	53.3	96.9		137	201	370
	18	98.8	30.3		59.3	260	87.4
	18.9	65	29.3		175	158	114
	34.5	39.4	75.5		120	174	269
	16.8	43.6	12.8		41.4	95	37.8
	16.2	46.3	61.7		32	203	130
	35.6	41.3	9.64		146	175	48.3
	20.3	53.4	29		84	146	86.2
	47.2	8.66	7.85		149	25.2	25.2
	22.5	72	43.8		104	136	83.1
	11.8	7.3	13.8		25.2	31	35.5
	29.4	29.8	66.7		126	84.5	170
	37.8	19.2	17.9		67.6	87.3	47.5
	93.1	6.6	12.2		211	19	31.5
	29.5	28.4	61.1		74.6	63.7	211
	125	37.1	51.5		235	160	196
	36	78.3	74.5		100	112	197
	32.9	29.6	33.3		83.5	82	122
	43.3	19.7	21.8		145	56.7	78.2
	33.9	19.9	21.5		82.4	61.4	60.4
	26.8	28.4	32.9		39.3	67.9	56.4
	65.8	44.8	9.99		137	179	28.9
	34.4	25.8	30.7		72.9	69.1	49.3
	40.4	33	14.4		151	111	37.2
	56	23.2	33.6		153	68.3	48.2
	36.5	51.8	46.5		82.9	135	145
	13.2	84.5	30.7		75.5	182	51.6
	6.62	96.4	107		23.7	257	222
	51	12.3	45.4		98.5	37.8	126
	15.1	28.8	18.5		53.7	72.2	49.5
	24.1	19.2	29.1		58.1	49	52.9
	85.9	30.5	11.3		232	77.2	28
	53.3	15.7	81.4		225	37.4	187
	80.2	121	35.2		225	344	80.7
	12.9	128	50.5		40.1	304	153
	14.6	46.2	13.3		33.6	84.8	33.1
	18.3	101	18.8		51.2	240	37.8
	17.6	28.3	32.6		44.3	94	77.7
	52.4	38.6	31.9		240	128	71.1
	38.6	38.3	65.8		78.7	87.1	184
	15.5	31.5	38.6		27.6	65.6	120
	27.3	37.1	56.2		91.4	77.3	209
	28.5	16.6	59.3		48.4	62.1	144
	42.6	7.72	33.6		139	19.5	146
	43.3	36.6	100		121	120	203
	15.9	48.1	52.9		31.1	125	243
	48.8	203	69.6		105	441	172
	46.8	15.9	5.35		108	59.6	16.7
	43.2	74.4	26.9		71.1	226	45.5
	19.1	41.6	13.6		65.9	91	27.7
	20.7	30.1	22.3		36.9	122	52.8
	75.8	16.2	53.1		174	30.7	130
	15.8	21.1	57.2		27.1	79.5	156
	25.3	27.7	11.9		48.7	102	25.9
