# Supplementary material for: Phosphoregulation accommodates Type III secretion and assembly of a tether of ER-Chlamydia inclusion membrane contact sites
Source: eLife. 2022 Jul 15;11:e74535. doi: 10.7554/eLife.74535 (PMC9286742; doi:10.7554/eLife.74535)
Supplement: Figure 3—figure supplement 3—source data 5. [file elife-74535-fig3-figsupp3-data5.xlsx]

## Sheet: Figure 3S3C
	%Positive VAP Recruitment
G0289 µM	Replicate 1	Replicate 2	Replicate 3
0	98	96	97
1	51	36	38
2	8	7	13
4	1	3	5
