# Supplementary material for: Phosphoregulation accommodates Type III secretion and assembly of a tether of ER-Chlamydia inclusion membrane contact sites
Source: eLife. 2022 Jul 15;11:e74535. doi: 10.7554/eLife.74535 (PMC9286742; doi:10.7554/eLife.74535)
Supplement: Figure 3—source data 1. [file elife-74535-fig3-data1.xlsx]

## Sheet: Figure 3A
	aCK2b	aGAPDH
Lane 1	5174.35	4913.43
Lane 2	1058.41	4112.6
Lane 3	326.092	3340.18
Lane 4	1678.28	2986.65
Lane 5	806.456	3647.13
Lane 6	1085.28	4629.84

## Sheet: Figure 3B
No siRNA			Pool siRNA			siRNA Duplex A			siRNA Duplex B			siRNA Duplex C			siRNA Duplex D
Distance	Intensity (AU)		Distance	Intensity (AU)		Distance	Intensity (AU)		Distance	Intensity (AU)		Distance	Intensity (AU)		Distance	Intensity (AU)
0	31.5		0	32		0	30.5		0	31		0	30		0	30.5
1	32		1	31.5		1	30.5		1	32.5		1	31		1	30
2	31		2	30		2	30.5		2	32		2	29.5		2	30.5
3	31		3	30.5		3	30		3	29		3	31		3	32
4	31.5		4	30		4	30		4	30.5		4	32		4	31.5
5	31.5		5	30.5		5	30		5	31		5	32.5		5	31.5
6	32		6	31.5		6	31		6	31.5		6	31.5		6	31.5
7	33.5		7	32		7	31.5		7	31.5		7	31		7	32.5
8	32		8	30		8	30.5		8	31		8	33		8	33
9	33.5		9	31.5		9	31		9	32		9	33.5		9	34
10	35		10	34.5		10	30.5		10	34		10	34		10	35.5
11	38		11	36		11	32.5		11	34		11	32.5		11	34.5
12	44		12	34		12	32.5		12	35		12	34.5		12	40.5
13	49.5		13	33		13	32		13	35.5		13	36.5		13	42.5
14	55		14	34.5		14	32		14	37		14	40		14	49
15	62.5		15	34		15	33.5		15	41.5		15	43		15	51
16	70.5		16	37		16	35		16	46		16	45		16	58.5
17	80		17	43.5		17	36		17	49.5		17	52		17	68
18	86.5		18	48.5		18	40.5		18	57.5		18	56.5		18	69.5
19	86.5		19	51.5		19	44		19	66.5		19	63.5		19	77
20	86.5		20	57		20	48.5		20	69.5		20	70		20	78
21	83		21	67		21	52.5		21	72.5		21	77		21	77.5
22	74.5		22	70		22	59		22	75.5		22	77.5		22	73.5
23	68		23	73.5		23	63.5		23	77		23	82.5		23	69.5
24	66.5		24	78		24	66		24	74.5		24	85		24	70
25	61		25	81		25	72		25	72.5		25	83.5		25	65.5
26	57		26	80		26	77		26	72.5		26	83		26	61
27	54.5		27	82		27	80.5		27	69.5		27	82		27	61
28	52		28	81.5		28	81.5		28	69		28	81.5		28	60
29	50.5		29	81		29	79		29	69		29	81		29	58
30	46.5		30	80.5		30	77.5		30	66		30	81.5		30	58.5
31	46		31	79.5		31	81		31	66.5		31	84		31	54.5
32	44.5		32	82.5		32	85		32	66.5		32	85		32	55
33	41		33	86		33	86		33	65		33	82.5		33	52.5
34	40.5		34	86.5		34	86.5		34	61		34	80.5		34	47.5
35	41		35	82		35	88		35	59.5		35	74.5		35	45
36	39		36	78.5		36	83.5		36	55		36	69		36	41.5
37	38.5		37	74.5		37	74.5		37	52		37	66.5		37	41
38	42.5		38	70.5		38	72.5		38	52.5		38	58		38	42
39	44.5		39	62.5		39	63		39	48		39	56		39	40.5
40	48		40	59		40	58		40	48		40	56		40	44.5
41	49.5		41	59		41	54		41	50		41	58		41	45.5
42	47.5		42	61		42	56.5		42	52		42	59		42	44.5
43	47.5		43	62		43	58		43	53		43	56.5		43	46
44	43.5		44	56		44	58.5		44	52		44	54		44	42.5
45	38		45	53		45	55		45	46.5		45	47		45	38
46	36.5		46	47		46	49		46	42		46	40		46	36
47	34.5		47	39.5		47	43.5		47	37		47	37.5		47	35.5
48	34		48	36		48	40.5		48	36		48	36		48	34
49	31.5		49	37.5		49	37.5		49	34.5		49	37		49	34
50	31.5		50	36.5		50	34		50	34.5		50	35		50	35.5
51	32		51	34.5		51	34		51	34		51	35		51	32.5
52	31.5		52	32		52	35		52	32.5		52	34.5		52	31.5
53	31.5		53	31.5		53	35		53	31.5		53	31.5		53	31.5
54	33		54	33		54	34		54	31.5		54	32		54	32.5
55	31.5		55	32.5		55	32.5		55	31.5		55	31.5		55	31.5
56	30.5		56	31.5		56	32.5		56	31		56	31		56	31.5
57	31.5		57	31		57	31.5		57	31.5		57	32.5		57	32
58	31.5		58	31.5		58	32		58	31.5		58	32		58	33

## Sheet: Figure 3E
	CFP-VAP Intensity in IncV Object				CFP-VAP Intensity in Cytosol
CX-4945 µM	0	0.625	10		0	0.625	10
	2491	2619	875		1706	1585	1119
	2663	1769	802		1679	1090	1245
	3254	1799	622		2650	1117	641
	1669	1763	797		1042	1666	955
	2058	2765	817		1170	1958	1304
	2174	1651	793		1666	1170	966
	2343	903	996		1880	798	987
	1602	2071	764		1290	956	1125
	1380	1901	670		1157	1168	712
	961	2792	743		706	914	807
	2935	2124	852		2030	1225	1215
	2420	1173	904		1569	805	1296
	2632	1648	808		2004	907	908
	2505	1912	826		1625	1409	1008
	2293	875	1231		1628	580	1639
	2762	2282	812		1751	691	1007
	2928	1937	840		1848	752	1132
	3606	1828	734		2671	1296	885
	1752	1568	794		1118	704	1176
	2253	2033	788		1631	1703	1348
	2387	1531	926		1713	1301	1371
	2127	1494	807		1759	1051	1117
	2081	3626	996		1366	2007	1143
	1930	1221	981		1306	966	1435
	2120	1411	989		1535	1023	1336
	1523	1118	1148		1344	1128	1210
	1586	1279	879		1011	1071	879
	2975	1256	884		1788	899	1038
	2030	1450	795		1485	1214	664
	2061	1708	713		1265	1338	998
	2796	1341	968		1415	1027	1506
	1737	937	708		1302	704	834
	1999	1027	733		1429	819	949
	1780	1451	1326		1428	1172	2329
	2796	1705	764		2353	1325	730
	2146	1100	754		1274	800	706
	2043	1258	824		1522	965	918
	2228	1038	820		1904	935	1263
	2839	1222	616		1639	889	635
	2829	1256	748		2160	820	648
	3183	831	1019		2213	682	1015
	3000	714	1010		1787	624	1250
	2664	1067	1175		1448	1086	1365
	3156	1133	1100		3115	1094	1682
	2547	1625	1080		1195	1116	1198
	1892	1062	963		1288	929	1259
	2163	865	1013		1772	706	1107
	1917	1099	1153		1356	946	1429
	2739	678	796		1634	625	805
	1150	1004	836		892	949	725
	2069	1470	1003		1462	922	870
	2224	1640	1036		1328	1062	1027
	1850	1305	1083		995	992	1276
	2494	1322	911		1561	880	1008
	2777	968	1645		1733	858	1138
	3844	1321	1110		1768	994	1441
	5912	1369	1072		3155	1149	1320
	4676	2453	845		3652	1627	1012
	3310	1807	915		2086	1108	1118
	2709	982	1110		1551	813	1426
	4923	1597	1654		2268	862	2012
	3575	2179	1165		1934	1214	1694
	2905	1188	877		852	750	1167
	2879	1541	783		680	1184	966
	2007	2803	731		1007	2254	721
	4074	1471	823		1473	1072	1004
	4441	1244	855		1493	871	814
	3260	953	1248		811	1072	1613
	1989	1443	991		588	959	1139
	3389	1732	1051		1479	1064	1518
	3278	1314	1058		1155	939	1201
	1731	1489	1586		843	1005	1416
	2051	1810	1063		650	1332	1156
	3551	1809	693		856	617	917
	2443	2300	1098		805	781	1041
