# Supplementary material for: Phosphoregulation accommodates Type III secretion and assembly of a tether of ER-Chlamydia inclusion membrane contact sites
Source: eLife. 2022 Jul 15;11:e74535. doi: 10.7554/eLife.74535 (PMC9286742; doi:10.7554/eLife.74535)
Supplement: Figure 4—figure supplement 1—source data 1. [file elife-74535-fig4-figsupp1-data1.xlsx]

## Sheet: Figure 4S1
CK2 Volume					Inclusion Volume
No CX-4945	CX-4945	CX5945 Replaced	CX4945 Washout		No CX-4945	CX-4945	CX5945 Replaced	CX4945 Washout
13.2	19.6	14.4	17.2		44	74.5	40.7	55
19.8	20.4	19.2	36.1		130	62.5	36.4	102
14.4	5.04	2.83	22		50.3	21.4	23.4	64.6
15.2	7.7	44.5	4.7		102	28.6	119	15.3
6.51	20.1	20.5	28.5		43.1	92.9	63.5	74
10.2	14	124	18.8		45.1	57.5	128	55.6
12.3	22.1	27.9	22		46.7	52.8	92.8	66.5
12	3.93	8.52	5.83		48.6	18.6	42.1	16.3
4.92	3.43	12.2	34.7		31.1	19.5	34.5	152
55.5	23.9	38.2	24.2		236	80.7	118	66.7
7.13	6.2	12.4	17.7		63.5	22.6	177	30.5
5.57	4.6	8.57	19.8		20.8	17	26.2	129
18.1	2.47	21.4	13.1		52.1	11.9	64.3	148
7.89	43	10.6	5.81		54.9	113	56	21.2
16.7	32.6	12.8	23.7		168	132	51.5	155
44.7	8.5	8.21	19.6		162	29.5	27.3	80.6
22.1	5.17	8.2	9.42		139	24.6	27.1	32.4
16.4	17.7	13.4	6.25		61.8	118	43.2	53.6
5.81	24.8	14.5	5.62		34.2	120	36.9	17.1
15.2	17.4	15.3	18.2		114	95.1	67.3	178
54.1	30	2.69	5.38		110	95.7	14.6	18.9
9.51	10.6	11	25.7		31.4	36	54.6	61.7
14.6	3.38	3.54	23.5		79.4	16.8	16.1	107
6.98	21.5	15.1	29.1		80.8	66.5	89.8	139
11.3	26.9	5.99	36.9		43.8	118	25	162
17.9	65.7	17.2	11.5		183	183	76.4	55.3
13.5	25.8	8.7	47.6		33.7	103	97.4	171
14.4	17.5	8.21	33		41.7	33.7	49.6	111
6.03	14.2	14.5	19.4		18.2	38.3	43.2	78
5.84	37	4.28	3.77		16.8	116	23.2	28.6
18.4	15.4	23.2	7.98		141	42.3	63.6	30.9
7.02	29.8	21.2	55.8		24.6	73.5	93.7	220
10.6	12.7	13	11.2		109	41.9	29.1	60.6
16.6	10.9	18.5	13		64.5	81.4	68.9	124
7.95	27.8	11.1	4.22		25.9	108	28.4	23.4
26.5	8.1	7.85	18.9		188	21	20.3	67.5
26.9	9.24	2.38	6.75		176	33.2	14.6	36.2
8.39	11.6	15.4	33.9		38.4	32.2	76.1	93.5
21.6	17.4	20.1	20.1		140	78.6	88.9	67.2
7.09	23.4	20.6	19.5		61.5	51.7	53.9	47.7
16.8	15.4	18.9	65		143	46.8	66.9	289
9.67	5.68	16.1	56.5		64.8	17.2	66.1	287
12.9	19.5	10.5	7.22		92.8	56.7	50.9	21.7
15.7	19	15.6	34		97.7	47.5	88.6	96.3
37.5	12.6	10.7	11.5		90.8	58.1	59.3	43.7
26.7	10.8	5.88	30.9		115	30	37.7	123
7.14	15.1	29.9	17		20.4	59	129	54.4
34	8.08	10.2	50.3		181	25.6	39.4	112
13.3	6.55	14.1	6.87		105	22.2	74.3	33.3
7.48	20.5	11.6	16.6		60.6	164	34	78.8
37.1	21.4	11.7	31		179	77.4	47.4	196
9.85	6.03	9	4.9		64.8	35.1	44.1	21.2
24.3	17.8	20.2	27.3		72.7	59.5	49.9	181
11.2	2.93	4.82	8.79		54.1	16.5	19.9	43.9
15.9	22.9	26	14.8		132	44.8	59.1	45.3
19.6	14.9	18.8	19.4		78.9	47.4	34.3	68.4
	9.42	6.88	14.1			45.6	21.3	56.1
	2.53	3.32	7.91			15.8	16.1	37.8
		5.81	93				19.5	143
			42.5					104
			15.5					59.7
