# Supplementary material for: Phosphoregulation accommodates Type III secretion and assembly of a tether of ER-Chlamydia inclusion membrane contact sites
Source: eLife. 2022 Jul 15;11:e74535. doi: 10.7554/eLife.74535 (PMC9286742; doi:10.7554/eLife.74535)
Supplement: Figure 4—source data 1. [file elife-74535-fig4-data1.xlsx]

## Sheet: Figure 4B
	YFP-CK2 Intensity in IncV Object			YFP-CK2 Intensity in Cytosol
CX-4945 µM	0	10		0	10
	2303	4755		1128	4388
	2416	5885		912	2654
	1880	4476		1128	2499
	3472	4260		2057	2882
	2506	1107		1330	1083
	1972	4731		1274	1966
	1672	4770		1092	1886
	1666	1418		1217	1021
	4832	3058		3517	1582
	2012	1179		1177	812
	3059	1538		1303	1053
	2115	3178		2069	1323
	1925	2578		1249	868
	1923	4255		964	1430
	5544	1557		5852	652
	1900	2325		1122	1099
	3765	12600		2218	10700
	1937	2831		1208	2205
	3225	5344		1379	3554
	1514	1691		809	858
	1486	1803		909	1017
	2014	2830		798	1731
	1357	7074		673	3299
	1713	4816		765	2137
	5367	4320		3965	2692
	2127	3775		1172	1047
	1399	8568		780	4970
	2034	4040		1356	1912
	1847	2919		1080	1580
	2776	8133		1207	5289
	2953	3469		1883	1705
	4698	20800		4158	14300
	1472	2967		1386	1153
	2106	2674		1351	1460
	950	15300		687	5878
	2261	2422		1020	1531
	2957	2482		1995	1216
	2093	6476		1677	1831
	2540	1479		1327	1519
	4050	5331		2236	2642
	5987	3347		3618	2523
	1429	4052		1002	2356
	1903	2649		951	3218
	2516	4078		1570	2581
	4787	32600		1734	22400
	2146	12200		1130	9586
	2931	1235		1486	1471
	4497	2174		2690	980
	6656	13900		2952	8620
	3858	1871		2333	2318
	2257	1708		989	1905
	6441	9912		4501	4277
	2628	8769		1401	3796
	2386	2525		1559	1376
	2968	4287		1951	3375
	3182	11600		1986	7413
	4636	3061		1976	2502
	3122			1556
	4788			2377

## Sheet: Figure 4E
CFP-VAP Intensity in CK2 Object						CFP-VAP Intensity in CK2 Cytosol
No CX-4945	CX-4945	CX5945 Replaced	CX4945 Washed			No Cx4945	CX-4945	CX5945 Replaced	CX4945 Washed
32200	7880	7369	10100			12200	12400	6162	7489
12700	8055	10700	11200			3152	9580	9519	4117
13500	18600	11800	18000			7823	12900	12100	12700
16100	10700	15500	18300			8395	2529	16100	15200
21400	9420	3690	16500			13900	9619	4116	6824
12400	2620	9350	9568			5835	1337	11800	6873
27200	10800	6695	17800			13600	14200	9619	13000
13500	14900	8476	15200			5164	3811	10500	13300
16300	16900	7491	12700			9233	11200	10600	7356
10800	8457	14400	14600			7878	8750	13200	10300
19900	11100	20700	17200			6752	10900	21100	8322
19900	12200	14500	10100			10200	11600	20400	4008
21200	13200	3041	18100			8052	11500	3330	6685
24900	5174	10900	13700			16000	6145	11300	8342
22600	14200	5048	23200			10600	19600	5037	6750
9669	10000	4707	16300			4616	14300	5247	7578
17300	6093	10300	17700			7446	6429	10400	11600
12800	10100	13300	27600			5451	10100	15800	9432
18600	15200	12700	27100			11700	22400	15500	19300
18900	33100	6041	10300			11600	40500	7010	3646
25000	12300	27300	14800			22700	15700	33000	9391
27000	17400	13500	10700			14400	23500	14200	8497
16500	16500	16600	23700			9340	20300	27000	14600
42500	9223	13700	31400			22100	12300	13400	12800
41800	17600	2753	8414			23400	6688	9525	5212
18200	5367	10100	28400			11800	3103	6415	14900
28400	14600	7638	6161			14700	5636	7282	3704
24300	8874	9338	30300			7959	8033	8971	13300
28300	29200	9455	15000			24400	26500	10300	10000
41200	21200	20600	28900			33800	24300	3681	18100
28000	11300	7724	25700			13700	10100	5640	12200
33700	9950	7484	19000			28700	12500	9433	7001
34000	14200	14500	18400			18000	15900	13000	8499
31300	12300	12900	29200			16100	16100	12400	13400
14900	29600	11700	20400			8701	36900	13500	4267
14200	22500	12300	13500			7530	25000	13400	6664
20500	15200	22800	24700			10000	18000	20800	11000
19700	16100	35200	10500			5864	16800	39100	6387
20200	12200	15400	10700			7113	10900	21000	5749
26400	9322	8275	11200			12000	9667	5274	3088
33900	11300	7856	29400			19600	17000	7115	16500
32600	20000	12900	27100			14400	23800	12100	13300
21200	5549	9174	14500			8801	4458	3692	10300
14300	5339	8076	25200			8158	4123	6419	15400
21900	9560	8387	29500			10600	12700	8765	17300
18900	7547	16700	30000			7043	9859	15900	15000
16400	14200	6749	18600			10100	16200	6886	8308
14600	13700	8103	25500			9393	16900	7276	17800
32100	20500	9869	33200			11400	23000	13700	13100
28800	10100	8672	27900			14000	14400	11900	17000
20200	15700	9602	28500			7701	13300	9646	11000
29000	19100	8091	20500			15100	14800	9376	7535
33600	8302	6668	11900			15100	10500	6319	7222
26100	10300	11600	25800			12300	15500	18400	11200
31400	6062	8579	19800			12400	4526	6186	14600
42500	11100	11200	18200			15600	12400	13000	11700
	14300	10700	20100				16900	10700	10400
	12200	24300	25600				15000	17100	12500
		8000	16600					7142	12700
			15100						7559
			26700						14300
