# Supplementary material for: Phosphoregulation accommodates Type III secretion and assembly of a tether of ER-Chlamydia inclusion membrane contact sites
Source: eLife. 2022 Jul 15;11:e74535. doi: 10.7554/eLife.74535 (PMC9286742; doi:10.7554/eLife.74535)
Supplement: Figure 5—figure supplement 1—source data 1. [file elife-74535-fig5-figsupp1-data1.xlsx]

## Sheet: Figure 5S1A
IncV Volume				Inclusion Volume
FL	1-356	1-341		FL	1-356	1-341
21.5	31.1	9.24		248	223	158
10.9	41.1	9.22		202	313	198
8.24	9.9	15.3		59.2	66.5	156
15.7	14.9	7.15		161	178	84.9
13.7	6.74	5.77		205	44.9	72.6
10.9	16.7	11.6		80.2	202	166
7.62	5.67	16.5		81.3	77.8	292
12.5	11.1	13.1		90.8	171	207
11.9	16.7	6.93		135	179	136
7.17	9.62	11.6		41.3	103	249
5.99	10.5	13.4		80.3	94.2	220
8.64	7.14	16.8		123	69	293
12.7	5	9.05		175	77.1	76.4
15.7	8.82	9.47		98.5	124	90.2
17.6	23.4	14.1		188	287	103
6.13	15.1	14.8		79.7	191	232
15.8	16.5	17		485	170	200
12.5	18.6	5.61		74.2	357	70.7
9.46	29.5	5.56		129	159	68.8
9.57	3.95	10.6		82	63.9	82.3
17.8	9.96	8.33		258	69.2	87.3
24.1	12.9	15.7		151	113	160
16.5	21.6	18.9		125	424	194
15	8.21	14.3		129	122	170
9.77	4.52	14.9		95.9	69.2	211
13.8	9.09	27.6		126	158	291
23.5	11.5	7.7		262	213	72.5
16.6	17.5	10.3		120	194	143
5.94	13.3	7.3		70.2	146	61.3
6.98	15.5	15.5		69.9	92.2	175
21.1	27.6	22.9		219	381	242
6.28	7.98	18		84.3	54.3	383
12.3	16.3	6.89		195	452	79
12.9	5.42	19.2		248	89.7	177
10.6	23.9	14.1		135	218	241
19.3	8.41	4.02		270	107	54.5
22	16.8	8.91		181	103	142
8.17	11.7	19.8		93.1	225	366
13.9	21.4	20.6		210	298	328
6.38	13.2	12.4		66.2	271	175
10.6	17.6	18.8		108	303	212
10.1	16.4	21		113	188	284
4.08	14	19.3		47.5	342	185
13.2	11.7	23		123	109	486
9.55	8.19	13.6		101	91.7	175
10.8	21.7	10.9		75.3	438	163
12.1	5.08	15.3		86.3	67	328
13.2	7.44	16.6		83.2	58.6	164
26	14	12		140	201	181
10.3	18.1	6.37		188	282	73.7
22.4	19.3	14.1		506	497	187
10.7	5.89	25.2		148	69.7	257
14.5	10	5.45		142	97.3	123
3.8	10.4	14.1		43.1	123	312
12.3	7.27	16.7		206	77.8	233
7.07	14.2	14.3		163	168	110
18.7	13.6	7.91		266	173	90.2
12.3	6.08	13.8		101	75.8	107
7.35	17.9	12.5		79.4	98.8	164
24.2	20	8.5		296	233	86.3
5.28	23.6	10.9		76	376	130
13.2	13.2	8.3		326	119	166
12.6	18.4	10.5		182	141	345
7.4	13.2	9.47		191	147	218
6.66	19.9	9.26		173	315	78.5
6.22	16	4.01		154	158	84
7.59	23.3	9.48		93.9	267	313
9.6	21.4	12.3		201	207	110
10.1	23.2	19.5		179	520	257
18.2	30.8	9.57		475	440	123
18	14	2.18		204	127	47.9
13.9	7	7.8		247	80.1	125
11.5	15.8	18.3		169	202	351
10.2	12.8	10.8		362	59.6	163
20.4	11.8	16.7		266	60.2	160
15.7	28	19		319	312	215
15.5	17.7	15.5		285	194	176
16.7	9.88	10.1		334	89.3	174
19.1	11.8	14.4		280	76.5	298
6.64	19.8	9.62		98.3	154	87.5
9.42	9.63	9.22		228	147	99.7
12	10.2	7.91		220	64.1	105
25.9	19.6	6.92		385	205	104
6.21	14.2	7.11		134	240	57.6
6.25	8.06	8.99		146	115	108
10.9	19	15.9		95.7	123	239
17.3	12.4	14.3		437	134	260
10.4	10.2	13.3		125	127	185
18.9	19	12.5		391	294	253
2.37	6.97	10		52.2	229	113
5.37		7.17		112		147

## Sheet: Figure 5S1B
IncV Volume			Inclusion Volume
WT	S3A		WT	S3A
73	17.1		283	46.9
108	20.6		425	53.3
19.4	34.9		38.2	121
21.8	29.9		70.4	108
79.3	7.14		332	25.1
26.1	41.7		194	124
40.8	69.3		135	325
29.9	35.2		154	119
58.7	20.8		129	77.9
46.6	9.66		151	33.8
32.9	1.33		91.2	14.9
47.9	59.8		225	235
30.9	31		116	121
46.5	28.4		87.1	100
31.7	5.45		96.4	25.7
46.8	46.6		106	163
21.7	54.5		79.8	241
40.6	20.8		123	64.2
52.7	42.8		178	334
18.5	8.93		68.8	29
42.8	20		112	60.8
28	8.05		93	32.2
84.9	7.87		277	23.3
22.7	29.4		84.9	113
29.3	27		110	75.3
65.4	14.2		163	81.9
5.54	23.6		36.8	127
13.8	13.7		81.4	63.9
17.1	10.9		115	44.3
77.7	32.4		226	148
77.1	14.8		365	61.8
2.94	5.8		23.5	29.7
9.51	22.6		71.1	126
32.1	30.7		122	106
66	45.4		170	103
49.1	24		146	62.8
38.8	45		94.2	150
134	47.2		310	243
4.66	19.9		17.3	43.9
73.4	29.1		235	55
59.4	60.3		125	224
64.1	59.7		151	121
91.5	31.2		190	62.5
14.9	15.9		95.1	33.5
73.9	10.9		269	32.9
39.4	35.4		184	83.9
30.9	86.5		130	314
18	12.4		65.1	37.2
31	11.3		54.9	37.6
73.2	3.57		217	19.7
40.6	64		127	131
16.7	40.4		62.9	91
47.8	80		93	131
103	58.7		266	263
28.7	12.5		71.2	27.1
47.8	57		128	167
35.1	59.1		119	135
19.7	28.5		100	82.1
41.7	7.51		115	24.7
30.7	47.3		146	111
42.9	64.6		184	107
24.5	36.6		94.9	148
22.6	45.6		52.6	129
23.8	53.3		70.3	112
27.2	9.89		60.5	32.2
16.8	33.7		56.4	102
28.6	71.3		98	149
28.1	26.9		105	82.3
18.4	70.9		51.1	180
30.1	6.36		112	36.5
36.1	41.5		160	92.7
20.3	75.1		67.9	185
50.4	34.3		176	79.8
	58.8			122
	20			37.6
