# Supplementary material for: Phosphoregulation accommodates Type III secretion and assembly of a tether of ER-Chlamydia inclusion membrane contact sites
Source: eLife. 2022 Jul 15;11:e74535. doi: 10.7554/eLife.74535 (PMC9286742; doi:10.7554/eLife.74535)
Supplement: Figure 5—source data 1. [file elife-74535-fig5-data1.xlsx]

## Sheet: Figure 5C
YFP-CK2b Intensity in IncV Object			YFP-CK2b Intensity in Cytosol
WT	S3A		WT	S3A
2913	1401		1808	1807
2430	4273		1300	4225
2803	1273		1434	1126
1494	3705		1277	3258
3158	5034		2505	9505
3002	7006		1854	7778
4018	5140		1808	7815
3303	1898		4718	728
4202	3849		4235	6002
10500	7322		12500	32200
2551	3447		741	6305
6162	1680		2471	1944
1937	2125		1088	1267
5895	6050		4370	14800
8725	5922		6055	12400
7783	6473		5508	6420
5803	3877		2920	6567
1946	1773		1257	2234
7867	1850		6375	1622
2102	4919		2390	5902
1910	1370		1659	1904
2835	10800		2659	13300
2252	3143		1310	4268
4214	997		2537	1324
2136	1452		1258	1979
2286	897		1094	1223
5638	1028		5903	1163
2251	1025		2434	1375
1757	1540		835	1906
1912	1020		1557	1243
2172	1674		1867	1789
1701	1094		963	1416
2061	1265		1454	1468
2124	1981		1403	2687
1552	1021		683	1226
1771	1263		1133	1455
4102	2224		3282	2952
1664	915		1209	1056
1978	1164		939	1272
3726	1726		1305	2602
2246	2874		2246	1309
3924	1071		3924	1071
5034	2625		5034	2625
1621	5237		1621	5237
1816	1495		2434	1495
2243	1455		1927	2865
1521	1494		1129	3161
1069	1093		942	1127
1303	845		1180	1071
1553	1174		1487	1080
2591	1163		1493	1277
1874	2026		2064	1716
1878	1512		1942	2557
1307	1415		956	2100
2307	974		818	1072
2549	1877		1665	951
2922	1963		956	2099
3001	2597		2369	1374
4563	2149		1654	2975
	2942			2807

## Sheet: Figure 5E
YFP-VAP Intensity in IncV Object			YFP-VAP Intensity in Cytosol
WT	S3A		WT	S3A
1800	666		747	665
2400	714		1121	845
2494	691		1876	849
1288	784		974	1150
1214	861		874	1132
3202	1215		904	2212
1640	665		594	925
2205	996		690	1328
1469	1154		787	1312
1259	906		645	1169
1099	741		657	748
1153	903		617	1234
3147	776		1467	1044
1558	570		756	580
2491	549		1140	519
1249	554		713	564
1085	612		810	625
1695	650		783	713
967	718		622	928
1178	619		688	717
1549	715		913	1033
1292	581		855	636
1136	550		690	568
2391	771		816	882
2227	703		897	933
1583	1880		727	1934
3311	1073		888	976
2385	813		902	972
1428	772		608	654
1099	731		639	915
1554	817		889	569
1689	636		889	569
1346	554		596	533
1622	530		593	524
2292	2180		1147	2666
938	942		775	893
1611	686		875	738
1801	762		914	855
1613	780		786	712
1222	641		681	648
1336	571		758	617
1559	645		706	791
897	653		603	656
1794	657		675	604
1359	762		617	795
5931	833		1528	1026
1187	756		724	751
1706	1107		1037	1368
1311	1356		662	1214
2814	684		741	645
1377	570		674	565
1928	620		1119	703
2309	796		1264	1028
3296	1057		1462	850
1331	856		665	901
1872	596		699	590
1197	751		815	1113
902	755		530	857
1261	588		678	648
1299	625		651	689
2005	749		777	833
1519	884		827	836
1606	1063		789	981
1746	714		710	809
1203	631		609	742
3247	879		1010	1036
2865	997		979	1738
2782	923		908	1618
2046	982		1190	1268
1318	790		724	1146
1907	883		741	1203
1580	729		735	699
	743			836
	885			918
