# Supplementary material for: Phosphoregulation accommodates Type III secretion and assembly of a tether of ER-Chlamydia inclusion membrane contact sites
Source: eLife. 2022 Jul 15;11:e74535. doi: 10.7554/eLife.74535 (PMC9286742; doi:10.7554/eLife.74535)
Supplement: Figure 5—source data 5. [file elife-74535-fig5-data5.xlsx]

## Sheet: Figure 5H
	WT			S3A
in nm	Inclusion membrane length	ER-Inclusion MCS length	% Inclusion covered with ER	Inclusion membrane length	ER-Inclusion MCS length	% Inclusion covered with ER
Inclusion 1	9820	5423	55.224	13250	1258	9.49434
Inclusion 2	26218	15547	59.299	6581	874	13.2807
Inclusion 3	18055	11970	66.2974	9669	230	2.37874
Inclusion 4	11250	6381	56.72	26413	5887	22.2883
Inclusion 5	6510	3358	51.5822	6580	547	8.31307
Inclusion 6	10561	6987	66.1585	7852	2874	36.6021
Inclusion 7	10059	7881	78.3477	5847	1441	24.6451
Inclusion 8	23210	12014	51.7622	30014	7841	26.1245
Inclusion 9	9201	2452	26.6493	7584	620	8.17511
Inclusion 10	17501	8058	46.0431	12540	1025	8.17384
Inclusion 11	14287	10420	72.9334	11125	602	5.41124
Inclusion 12	13058	9870	75.5858	14781	1358	9.18747
Inclusion 13	21220	10871	51.23	8087	587	7.25856
Inclusion 14	13514	6157	45.5602	8745	975	11.1492
Inclusion 15	15410	11874	77.0539	7842	150	1.91278
Inclusion 16	6587	2359	35.813	9874	1240	12.5582
Inclusion 17	16555	10874	65.6841	22571	2478	10.9787
Inclusion 18	9880	6131	62.0547	9800	887	9.05102
Inclusion 19	6541	3501	53.5239	4874	540	11.0792
Inclusion 20	7710	3550	46.0441	8701	1099	12.6307
Inclusion 21	8517	4821	56.6044	11477	1502	13.087
Inclusion 22	23877	11587	48.5279	18741	1850	9.8714
Inclusion 23	17474	9338	53.4394	10070	874	8.67925
Inclusion 24	12025	5962	49.58	9870	784	7.94326
Average			56.3216			12.0947
SD			12.6985			7.89722
