# Supplementary material for: Phosphoregulation accommodates Type III secretion and assembly of a tether of ER-Chlamydia inclusion membrane contact sites
Source: eLife. 2022 Jul 15;11:e74535. doi: 10.7554/eLife.74535 (PMC9286742; doi:10.7554/eLife.74535)
Supplement: Figure 6—figure supplement 1—source data 1. [file elife-74535-fig6-figsupp1-data1.xlsx]

## Sheet: Figure 6S1A
IncV Volume								YFP-VAP Intensity in Cytosol
WT	Y287A	F263A Y287A	T265A	T265A Y287A	T265D P266A	T265D P266A Y287A		WT	Y287A	F263A Y287A	T265A	T265A Y287A	T265D P266A	T265D P266A Y287A
60.6	61.9	33.9	64.7	32.1	24.2	33.7		211	155	103	154	142	76.4	243
86.3	15.5	21.9	113	30.3	7.59	8.54		236	46.1	74.7	323	139	29.7	30.5
192	60.1	26.7	65.5	12.9	5.87	12.5		297	186	97.1	105	60	29.6	55
142	84.4	55.5	70.1	20.7	10.6	5.44		250	288	283	205	60.7	54.3	24.9
84.1	18.3	27.4	20	56	24.1	23.3		272	59.4	96.5	82	211	94.8	80.1
72.7	20.9	29.2	17	85.2	46	23.4		261	69	107	42.7	412	140	93.5
21.6	26.6	22.1	53.6	86	5.7	52.3		95.4	64.3	64	137	213	28.7	261
10.1	109	65.9	4.16	13.7	27	40.9		55	312	357	22.9	68.1	118	201
111	81.7	50.1	84.4	30.3	9.03	11.6		519	196	116	246	173	28.4	52
29	3.2	122	7.93	100	36.6	11		121	19.4	308	34.3	378	162	50.1
21.9	37.3	106	63.7	73.3	48.7	10.2		78.9	177	453	181	166	257	47.9
134	25.2	87.1	89.5	58.6	29.7	12.3		245	98	473	228	148	75.5	63.3
13.2	32.2	63.8	11.8	38.4	77.4	23.5		39.2	94.9	226	33.6	196	312	92.5
114	6.24	147	4.85	31.1	15.3	44.4		225	16.5	187	18	75.3	82.9	203
19.2	17.5	5.07	139	12.8	24.1	42.6		79.7	52.8	23.5	247	58.4	87.6	242
32.5	35.9	77.4	7.85	2.94	5.97	58.5		141	111	247	20.9	15	27.2	361
70.9	29.1	89.4	8.36	27.4	7.42	42.1		188	120	255	25.7	93.4	28.3	220
91.9	56.3	7.28	24.5	66.6	10.1	29.3		276	145	24.6	53.4	246	31.4	118
44.2	120	66.3	91.7	40.6	35.2	19.5		208	289	188	199	116	224	110
74.8	185	34.9	69.2	51.8	6.43	14.4		240	501	115	184	116	22.8	62.9
5.57	133	85.6	38.6	95.6	24.6	28.6		22.4	316	285	193	328	91	162
75.5	42.7	15.3	74.6	38.4	3.07	17.6		210	128	61.9	228	125	13.2	72.1
174	23.4	66.5	4.67	65.3	42.4	20.3		336	111	269	35.1	225	149	107
72.1	57.5	49.7	96.9	26.2	14.9	29		288	223	162	322	76.8	55.6	151
32.8	77.6	16.5	112	31.3	12.9	12.6		55.9	274	57.5	251	83.3	43.2	45.6
10.4	16.7	70.6	2.8	43.7	5.67	32.9		48.6	47.5	279	17.5	127	25.3	109
92.4	46.6	17.7	67.4	59.6	42.7	35.3		182	107	62.6	173	295	157	185
121	33.8	45.3	26.5	21.2	54.4	33		246	115	231	50.9	102	210	153
37.8	76.2	117	31	42.9	23.8	33.8		109	173	322	122	150	90.9	119
40	85	77.3	54.6	47.7	23.1	44.1		156	261	172	206	141	67.4	144
79.3	21.6	71.4	42.9	32.9	11.6	34.8		185	63.8	312	145	120	34	163
92.4	52.5	22.1	26	65.6	20.4	11.8		295	170	81.3	128	287	62.9	54.9
59.6	11.1	27.1	85.1	8.22	39	21.7		215	36.5	81.1	226	34.8	181	108
113	44	51	47.7	7.49	79.4	9.17		392	104	204	132	31.6	248	27.1
19.6	28.9	70.1	96.2	60.4	14.4	17.3		104	78.3	252	250	193	66.2	66.1
52.5	51.2	55.7	22.2	18.9	7.55	9.23		219	153	195	72.9	63	37.7	47.3
24.5	77.8	75.5	29	5.57	6.94	10.1		64.1	194	287	82.3	34.7	37.5	44.1
16.2	63	33.8	109	47.2	54.6	12.6		36.4	236	138	207	201	227	45.1
8.14	33.7	109	56.1	17.1	52.2	31		31	112	485	135	51	262	147
48.8	15	24.7	5.41	34.5	34.4	27.9		86.1	62.9	141	18.5	107	106	132
20.4	21.8	25	40.9	36.5	44.4	32		50.4	50.2	220	342	132	88	206
53.2	17	6.59	75.1	1.28	11	9.34		137	55.7	37.9	198	22.3	41.7	44.4
14.5	30.3	7.14	13.2	15.6	30.7	21.5		63.6	78.7	56.6	37.9	53.8	71.7	104
15.6	50	13.6	23.9	15.9	78.7	23.9		53.1	148	72	104	54.7	334	87.6
41.3	2.99	23.9	19.3	48	48.5	36.7		177	17.4	125	94.5	247	158	147
34.8	18.9	9.24	21.8	5.66	35.3	17.7		218	74.5	55.6	107	30.8	147	96
6.12	81.3	18.7	31.9	11.6	37.4	41		19.8	203	99.7	118	49.3	135	193
30.8	41.9	61.3	17.5	2.48	14.1	31.9		116	130	266	45.1	20.4	73	82.2
5.26	12.4	25.4	52.7	15.6	10.6	52.1		27.2	35.2	119	188	72.4	25.3	160
17.4	29.3	16.2	7.91	19.9	49.2	40.8		82	79.8	73.7	38.3	105	147	158
23.1	30.4	11.1	12.8	27.3	31.4	13		102	93.4	72.2	38.8	99.6	133	57.5
72.1	76.5	11.4	68.3	26.8	48.5	54.2		224	236	35.1	154	84.3	150	231
12	39	31.6	23.9	15.5	32.3	19.2		48.9	97.7	117	86.7	62.4	131	67.9
59.9	19.1	90.1	2.96	1.18	33.2	17.5		117	78.8	275	24.7	17.9	119	57.2
5.47	12.4	77.7	32.6	49.5	46.3	12.4		33.8	51.3	311	74.4	232	142	44.6
33	102	39.9	19.2	57	38.8	51.8		187	222	159	61.9	212	181	209
74.2	32.5	44.6	19.7	22.8	15.6	61.5		246	75	182	54.6	75.8	73.9	225
7.47	51.7	3.86	12.7	18.3	44.6	8.18		22.9	171	28.9	44.6	59.6	191	28.9
13.2	65.5	6.65	7.91	28.5	31.5	29.5		81.3	138	35.6	28.1	62	142	84.5
10.4	35.8	8.02	37.1	22.1	25	11.5		52.1	207	32.1	111	59.7	138	45.4
8.23	17.5	17.5	16.5	6.91	5.34	3.79		38.8	44.1	105	58.5	34.3	28.5	35.1
10.5	16	20.3	38	22.2	31.1	7.97		46.4	65.7	73.7	164	109	151	28.9
51.9	19.4	10.3	32.2	7.66	43.5	32.3		171	85	47.2	73.5	34.2	191	156
46.3	7.99	36.3	24.4	4.63	33.2	11.2		179	42.9	122	67.4	35	167	61.4
23.8	42.1	9.45	70.9	3.71	13.1	33.3		94.2	152	54.7	224	27.4	66.6	107
10.1	19.8	18.8	13.4	40.5	51	35.5		48.3	62.1	83.2	41.4	189	226	142
37	40.8	85.1	4.89	9.29	55.4	16.8		191	105	285	31.7	39.2	223	65.1
49.8	34.4	73.7	101	46.7	16	17.8		178	94.6	244	226	207	88	57.8
17.1	8.97	18.7	21.9	12.2	38.4	17.9		94.1	30.9	112	141	51.3	226	46.9
22.4	88.6	2.2	25	21.3	19.2	27.5		83.1	284	22.2	106	120	79.1	126
8.91	18.4	26	12.4	42.7	11.9	15.4		26.8	88.4	91.9	45.9	132	50.4	33.4
10.4	40.3	30.9	32.8	33.7		47		52.8	134	68.3	112	111		180
55.2	53	35	32.1	33.3		40.9		216	150	210	125	130		203
37.3	14.7	57.3	10.7	58		20.3		104	50.1	223	39.6	165		89.3
55.8	60.8	82.9	58.9	25.3		17.4		200	145	237	242	84		46.1
76.5	24.9	17.2	40.9	102				318	147	57.5	141	368
57.2	13	39.6	7.96	29.3				200	50.7	128	30.7	86.7
25.2	17.9	30.6	17.7	51.7				85.9	53.7	201	72.3	234
36	73.6	8.77	24.1	13.5				138	275	45.6	97.2	52.5
8.12	38.7	59.7	42.8	36.8				45.4	135	187	110	185
39.8	62.7	39.9	8.74	28.3				125	137	179	29.6	152
52	22.4	12.9	41.3	25.7				150	85.7	67.1	135	154
36.3	32.6	55.2	58	49.8				163	98.2	278	151	279
37.5	71.4	19.2	26.7	37.7				104	212	55	61.7	191
13.4		22.8	28.4	33.4				33.9		112	84.4	100
44.7		46.1	22	13.6				187		218	110	63.8
50		14	49.4	36.2				161		72.8	217	169
51.5		81.2	50.9	12.7				174		344	145	71
79.9		63.3	19.8	17				307		213	60	132
33.5		48.8	26.7	30.2				103		207	156	158
5.66			23.3	56				38.7			91.4	158
3.54								27.4
16.1								51.1
21.4								69.3
35.5								118
12.1								59.1
6.97								35.6
15.5								60.3
45.2								170
14								46.7
5.38								23.1
18.8								79.7
34.4								112
72.3								200
32								83
12.8								50.7
6.17								38.5
6.16								40.8
7.53								32.7
13.4								58.3
4.54								20.4
12.1								47.2
20.5								59.3
24.1								66.1
15.9								53.3
6.42								23
8.74								47.5
33.5								124
25.6								92
12.2								77.5
28.5								73.8
71.7								249
28.3								95.2
5.38								28.5
17.2								55.1
32.5								138
7.11								33.1
40.2								116
29.3								124
19.2								106
23.5								125
14.3								47.4
26.5								84.3
21.5								84.9
69								146
5.88								30.3
38.1								135
66.5								215
19.6								64.5
18								60.3
20.1								76.2
12.9								39.5
9.39								31
23.1								114
30.8								91
28.6								96.2
36.5								149
14.6								51.6
33.2								97.4
64.5								237
9.68								36.6
26.8								84.8
5.14								27.4
3.98								21.8
16.1								40
27.4								74.2
11.9								45.9
33.6								168
18								66.9
8.83								35.5
12.8								40.1
97.5								195
7.96								37.3
31.2								119
14								41.1
28.9								77.1

## Sheet: Figure 6S1B
IncV Volume				Inclusion Volume
WT	S3A	T265D P266A S3A		WT	S3A	T265D P266A S3A
5.66	15.9	64.8		38.7	120	239
3.54	15.4	10.1		27.4	49.8	41.4
16.1	58.4	14.1		51.1	265	44.6
21.4	38.4	31.6		69.3	212	111
35.5	24.7	9.26		118	77	38
12.1	29.6	15.2		59.1	64.7	47.6
6.97	8.83	8.93		35.6	28.5	38.7
15.5	19.4	48.7		60.3	52.8	229
45.2	30.9	20.1		170	119	66.4
14	40.4	20.5		46.7	149	59.5
5.38	36.3	30.1		23.1	167	175
18.8	65.3	44		79.7	234	194
34.4	7.71	13.7		112	45.2	69.7
72.3	9.13	35.7		200	35.4	153
32	22.3	35.4		83	77.3	105
12.8	9.44	33.6		50.7	27.9	165
6.17	46.6	22.8		38.5	126	66.6
6.16	17.5	51.7		40.8	61	216
7.53	11.4	12.9		32.7	38.2	36.8
13.4	21	23.3		58.3	70.9	96.2
4.54	6.1	29.7		20.4	31.9	141
12.1	35.4	16.3		47.2	151	50.4
20.5	57.3	22.6		59.3	313	96.6
24.1	73.9	55.8		66.1	296	319
15.9	20.3	7.86		53.3	76.5	31.4
6.42	1.78	23.1		23	33.2	85.2
8.74	42.3	8.87		47.5	128	33.5
33.5	19.4	60.5		124	95	195
25.6	9.61	20.4		92	41.5	68.4
12.2	53.1	25.9		77.5	179	112
28.5	70.9	14.7		73.8	201	42.1
71.7	16.3	110		249	53	315
28.3	2.4	37.2		95.2	19.1	189
5.38	31	2.9		28.5	74.2	20
17.2	19.3	76.5		55.1	70.5	241
32.5	34.3	15.7		138	166	59.4
7.11	7.19	13.3		33.1	28.2	53.7
40.2	10.4	27.9		116	37.9	97.7
29.3	7.06	46.2		124	32.9	156
19.2	21.5	3.7		106	50.9	24.2
23.5	8.89	19.5		125	37.7	82.8
14.3	17.1	14.1		47.4	59.5	54.7
26.5	5.73	23		84.3	24.3	125
21.5	1.81	5.03		84.9	17.4	18.2
69	51.1	56.3		146	139	243
5.88	18.3	74		30.3	67.8	234
38.1	20.6	33.9		135	64.9	129
66.5	3.11	52.6		215	22.3	215
19.6	16.5	21.5		64.5	57	95.5
18	3.61	46.4		60.3	29.9	187
20.1	30.6	22.9		76.2	158	93.4
12.9	24.6	29.4		39.5	80.7	124
9.39	9.77	23.7		31	40.8	99.4
23.1	28.9	7.45		114	138	44.4
30.8	13.7	29.3		91	67.3	125
28.6	14.3	3.59		96.2	58.8	9.32
36.5	34.9	47.7		149	146	231
14.6	74.2	19.1		51.6	258	74.6
33.2	10.9	18.2		97.4	58.2	60.5
64.5	54.9	13.8		237	122	42.9
9.68	20.6	67		36.6	60	253
26.8	43.9	36.1		84.8	201	132
5.14	6.3	4.76		27.4	32.5	16.6
3.98	12.1	3.45		21.8	44.5	12.5
16.1	32.9	40		40	156	188
27.4	17.7	3.29		74.2	73.6	9.1
11.9	13.6	13.3		45.9	66.8	44.8
33.6	27.1	5.65		168	153	17.3
18	20.6	10.9		66.9	86	24.7
8.83	18.8	26.9		35.5	163	82.8
12.8	2.78	4.49		40.1	20.6	12.3
97.5	31.6	8.6		195	102	18.1
7.96	30.4	18.9		37.3	165	65.5
31.2	12.3	17.9		119	59.7	63.3
14		29.2		41.1		145
28.9		22.1		77.1		97.2
73				283
108				425
19.4				38.2
21.8				70.4
79.3				332
26.1				194
40.8				135
29.9				154
58.7				129
46.6				151
32.9				91.2
47.9				225
30.9				116
46.5				87.1
31.7				96.4
46.8				106
21.7				79.8
40.6				123
52.7				178
18.5				68.8
42.8				112
28				93
84.9				277
22.7				84.9
29.3				110
65.4				163
5.54				36.8
13.8				81.4
17.1				115
77.7				226
77.1				365
2.94				23.5
9.51				71.1
32.1				122
66				170
49.1				146
38.8				94.2
134				310
4.66				17.3
73.4				235
59.4				125
64.1				151
91.5				190
14.9				95.1
73.9				269
39.4				184
30.9				130
18				65.1
31				54.9
73.2				217
40.6				127
16.7				62.9
47.8				93
103				266
28.7				71.2
47.8				128
35.1				119
19.7				100
41.7				115
30.7				146
42.9				184
24.5				94.9
22.6				52.6
23.8				70.3
27.2				60.5
16.8				56.4
28.6				98
28.1				105
18.4				51.1
30.1				112
36.1				160
20.3				67.9
50.4				176
