# Supplementary material for: Phosphoregulation accommodates Type III secretion and assembly of a tether of ER-Chlamydia inclusion membrane contact sites
Source: eLife. 2022 Jul 15;11:e74535. doi: 10.7554/eLife.74535 (PMC9286742; doi:10.7554/eLife.74535)
Supplement: Figure 6—figure supplement 2—source data 1. [file elife-74535-fig6-figsupp2-data1.xlsx]

## Sheet: Figure 6S2B
	aMBP (VAP)	Ponceau (GST)
Lane 1	0	3764.5
Lane 2	4028.01	1302.7
Lane 3	2839.77	1528.65
