# Supplementary material for: Phosphoregulation accommodates Type III secretion and assembly of a tether of ER-Chlamydia inclusion membrane contact sites
Source: eLife. 2022 Jul 15;11:e74535. doi: 10.7554/eLife.74535 (PMC9286742; doi:10.7554/eLife.74535)
Supplement: Figure 6—figure supplement 3—source data 1. [file elife-74535-fig6-figsupp3-data1.xlsx]

## Sheet: Figure 6S3B
YFP-VAP Intensity in IncV Object						YFP-VAP Intensity in Cytosol
WT VAP		VAP K50L				WT VAP		VAP K50L
WT	F263A Y287A	WT	Y287A	T265A		WT	F263A Y287A	WT	Y287A	T265A
5600	1719	4045	4385	4423		2547	2491	2328	6487	3982
9625	1551	7432	1349	3826		2434	3922	3719	1618	3378
7067	3261	3028	1898	1714		1319	7449	1757	3778	1404
5743	1007	3818	2492	5049		2996	2218	3826	3423	4018
14200	2437	4605	4106	3895		5509	4396	1192	5154	3502
9652	937	3988	1016	3168		5359	1604	2449	1188	3564
5161	1587	3902	4911	1752		1725	2568	4059	6797	1393
10900	1682	1425	3549	5592		5469	3498	1144	4981	2933
4573	1588	1772	3737	2934		1107	3966	1493	4920	2673
6736	838	1480	911	4396		2865	1056	865	1055	3563
3763	1085	1518	3154	2339		3359	1533	1427	5220	1985
2738	1218	6666	4057	1849		961	1940	3053	7157	1978
4223	2332	4620	3521	2477		1367	3148	2484	3787	2923
6900	1836	4110	2115	4870		1510	3647	3426	2950	3909
3543	943	3496	997	2552		1811	1076	4004	1111	2019
4726	2371	3744	3513	1291		2421	4493	3139	4533	1319
4432	1234	2933	3127	3236		1823	1582	1885	3649	3647
13900	1666	2203	1465	4444		4345	2724	2145	2757	3769
10400	2063	1898	2207	1092		3304	2393	1496	4425	1066
5697	2001	4324	1598	4231		1718	3103	4024	1655	5043
8566	1863	4426	2591	3966		1987	4126	3421	2972	3629
10700	940	3324	5369	4027		5117	1445	3636	5150	3430
6926	2350	4352	2585	1912		2480	4709	3046	3551	2467
5994	2582	4126	1100	2282		1908	4454	3443	1969	2361
10400	2936	4055	5103	1205		3217	5260	3650	7258	902
5386	3370	3844	3552	4569		2193	6178	3324	5248	3437
2335	1241	4070	4019	6133		846	1003	2361	5382	5259
12900	2175	9278	1502	4437		2950	2637	8131	2147	5076
11200	2794	6929	1565	4464		2479	5161	4703	3822	4424
10800	1244	2812	2562	2342		3544	2268	2283	3109	4673
11200	868	5629	4260	4951		2784	986	3776	6093	2815
9179	888	1806	2581	6143		2701	1330	1590	3628	5994
13100	1830	4029	921	5577		4058	4238	3159	1333	4862
20800	1272	1545	5616	4188		7950	2773	1671	9405	2691
19900	1836	6136	3049	3501		3735	4527	2594	4371	2941
20500	2037	1770	3235	2252		4473	4015	1205	4068	1821
8038	783	4183	1510	1455		2559	907	1810	1607	1515
5556	1733	3820	971	3818		1468	2927	2462	1252	2730
9980	1193	2928	1432	2575		2003	1793	1718	2255	2795
9090	940	5568	2339	1912		3002	1556	4758	3697	1614
9914	1073	2359	1849	2101		2011	1652	2075	1662	2215
11100	994	4569	1381	5461		3160	1330	3841	2000	3845
9998	1150	2607	1687	2206		4013	2263	2414	1988	1369
9142	2175	4699	3773	2524		1414	5289	3051	6370	1973
16600	3242	8248	1017	2292		2885	5526	4819	977	2001
10300	1568	1501	2076	4564		2175	2548	1015	1577	2554
5333	2321	2089	2716	3017		1853	4598	1165	2411	1965
7855	969	4642	2433	5026		2966	1037	3459	1975	4659
6621	1183	1719	2128	2443		2164	1516	1500	2220	1934
16400	1007	2041	5679	4740		5221	1462	1401	8921	3731
11800	2084	3195	1891	1222		3474	3132	2513	2565	1273
8597	1536	2676	1551	6156		1705	2899	2455	2476	3816
4457	4214	14400	2346	6775		1569	7412	7235	2673	5091
18900	2679	8957	1546	7843		3644	3968	7137	1878	6160
21300	3266	4051	1695	7740		6958	3772	2878	2569	5963
14700	4332	9611	6930	4847		5090	7266	4255	8131	3354
9045	1558	8729	3943	2988		2190	1801	5574	4355	2323
4506	875	5953	3762	5326		1089	1355	3785	5504	3552
7110	2107	8589	2157	2930		2561	2900	4660	3301	3850
10600	1906	4441	1704	4562		2503	2860	2300	2316	3881
24600	1436	3188	1378	9302		8577	2068	2296	1907	5618
16700	1487	8855	2362	5992		2575	2527	4186	1421	4627
9427	2075	6296	4244	2910		4500	937	2200	5049	2850
13900	3824	9126	1435	4845		5656	7804	5623	1384	4202
11800	2614	6031	2997	6769		5344	5570	3785	3023	6580
23300	3880	4269	2332	4577		10000	6103	4594	2939	3923
17000	1751	3814	2992	1953		4256	3191	1365	3894	1929
6407	2735	12800	2010	3384		1112	6245	8185	3756	2702
13700	1326	24900	2919	3076		6941	2016	7875	2858	2054
4156	4595	7326	5964	3129		5190	9623	3407	6572	1167
9917	1251	5147	5053	5103		4381	1447	3321	4548	4904
7054	1245		2657	4315		1654	2019		2625	3849
	2013						2844
