# Supplementary material for: Phosphoregulation accommodates Type III secretion and assembly of a tether of ER-Chlamydia inclusion membrane contact sites
Source: eLife. 2022 Jul 15;11:e74535. doi: 10.7554/eLife.74535 (PMC9286742; doi:10.7554/eLife.74535)
Supplement: Figure 6—source data 1. [file elife-74535-fig6-data1.xlsx]

## Sheet: Figure 6C
YFP-VAP Intensity in IncV Object								YFP-VAP Intensity in Cytosol
WT	Y287A	F263A Y287A	T265A	T265A Y287A	T265D P266A	T265D P266A Y287A		WT	Y287A	F263A Y287A	T265A	T265A Y287A	T265D P266A	T265D P266A Y287A
1937	997	1359	1232	1281	12100	5633		688	2016	1009	967	1630	4115	7442
3245	1876	1645	1039	1414	11300	2016		1357	3222	1424	670	1880	3597	3009
2050	876	1109	4783	957	11300	2543		1039	1476	736	3054	1289	3931	3415
3572	2083	755	4825	1177	19300	1991		1603	1106	1724	2894	1855	7532	2234
1221	2207	1650	3863	713	23000	3252		1477	2198	1522	1650	712	6433	4463
2321	3654	1764	6065	1098	12400	2712		953	1678	2798	2345	935	6115	4768
2905	2565	1986	3172	1358	14500	2643		882	3706	1955	1662	1669	5902	2000
5739	4217	2468	4913	834	16800	2466		2476	2598	1781	1583	900	4012	2869
2680	1347	2146	2742	1820	16600	2737		1036	1577	937	1676	1658	5250	3868
1412	5478	2008	4145	761	9896	5325		649	4429	3493	2067	873	7179	6026
3579	2944	544	1435	1158	13400	3827		1518	565	1930	1015	1547	5478	5756
3781	3174	1262	2423	1407	18700	4749		2019	1863	1125	1611	2139	9887	4810
5447	1151	1207	2878	3083	10800	5151		2394	1868	792	1652	5843	3934	4758
3027	3059	1002	2959	1505	7098	4854		1614	1205	1987	2149	2832	2013	6209
789	2016	1172	2438	1394	19400	1783		552	1489	1109	3299	2697	5836	3285
849	2916	1064	3463	1162	4236	1892		539	1320	1314	2060	1211	3825	2776
709	4737	1640	2569	944	14200	3114		553	3256	5141	1140	1457	5319	3709
4892	2328	1279	1675	1871	9676	2927		2183	1848	1153	1484	2791	4117	3542
3560	1978	668	845	1080	12100	2418		1054	773	2228	958	1705	1939	3227
3109	3281	1824	769	1330	17100	2861		1240	4167	4409	612	2482	7129	2641
6451	1703	782	3403	1336	12700	9065		2417	1231	1950	1413	2059	3143	7117
4396	824	729	3051	1632	11500	1892		841	1023	634	2217	2461	4171	3823
1728	1934	682	3338	1088	9122	1953		669	892	1260	1777	1626	1926	2052
1877	1172	739	2996	1981	15000	2379		912	969	706	1706	4074	4927	3468
8203	3301	784	1627	1907	5417	8441		2743	1043	2383	1274	3995	1969	14100
7209	1950	1063	2878	1364	11700	1240		1748	2389	1394	1132	2002	4087	2136
2411	968	1125	3063	2367	17000	2053		1107	1536	1693	2946	3605	4025	2405
5641	6076	1483	5001	1358	18800	1357		1389	2757	1762	3107	2663	6873	1649
2301	2397	1998	2273	1017	14200	2069		819	5146	1659	1251	1922	4374	2605
5191	2388	1196	2352	949	17000	1613		1238	2472	1940	1405	1482	6307	1889
6490	2592	1052	1556	1547	27500	1616		2336	976	2297	1175	2377	17200	1950
4759	933	1285	4104	1536	21300	4649		2652	962	3860	2883	3019	9685	5057
1184	2031	1410	2362	1107	9844	2385		579	4557	1531	2019	1999	2901	2792
4260	2267	1161	6171	1468	4507	1945		1621	1835	1745	5505	3528	2560	3662
7161	2358	1067	2828	1676	22700	5038		3357	1793	2474	2127	3105	10700	5411
4525	938	1334	1367	760	16500	5163		4404	1501	3104	804	1168	5631	6616
7127	1220	2111	3666	929	14200	2805		2156	531	2006	2449	1668	3933	3294
2761	5445	1364	5667	1883	6439	6960		983	1594	3755	4281	3984	1853	9042
5796	3947	1294	5442	1637	10900	6775		2114	1954	1268	4450	3091	2441	4930
3963	2325	1572	4383	1072	10800	6533		2494	1674	2483	2606	1577	2531	6497
6358	5285	1664	4746	1230	9578	2893		2695	977	851	967	2329	3770	2101
3151	1165	1160	2722	1392	17800	5960		1185	1068	3154	1707	2631	4460	7755
2654	2519	1370	5809	1266	11900	2779		986	5505	1712	3530	2606	5666	4484
6460	2463	1043	2733	1253	15300	1820		3545	3037	2596	1557	1861	9166	3056
2405	3169	1297	3388	941	12700	6870		961	775	1974	1511	1003	5227	9030
3122	3875	967	2116	1819	14500	3434		1341	3395	825	957	3407	3760	3356
9241	984	1968	5561	1556	6416	4777		4234	861	2773	4587	3134	2920	3701
7635	2428	1016	3018	1050	5329	2912		2034	3754	1014	2272	1878	811	4197
4732	2576	1287	1578	1371	4231	6897		1413	1434	877	926	1800	583	5259
6574	3041	848	4464	1752	6594	6605		1665	2095	2940	1759	2464	1452	7853
7985	2268	690	1783	628	5973	4438		2759	1936	2061	1408	688	1488	4670
5252	2589	1362	2457	1103	4542	2021		2048	963	1656	1287	1660	1831	2217
13200	1577	832	7941	1547	5252	5108		3201	1690	2508	3467	3459	2001	5183
4508	1024	693	4161	739	17400	2647		1896	2463	3183	2363	1605	4859	2926
2332	3902	1789	1854	1096	9429	1469		1024	2088	1270	974	2015	2930	2183
6050	3903	1169	2588	1001	4786	5681		1818	2052	2965	1288	1481	898	7438
3136	3383	994	821	1249	8357	1510		2836	2564	2348	720	1481	1908	792
6481	4069	1234	2803	1193	3100	2987		1079	1220	2932	1357	1921	850	3353
9824	4097	1624	2216	1086	3973	4936		1861	850	1888	1576	1409	1105	4215
1356	1544	838	4938	1227	13600	5220		739	2247	2620	2536	2877	5062	7578
7469	3334	1642	2413	1064	7052	3202		2696	3682	1399	1334	1903	2931	4039
9079	8295	1550	3309	1287	5595	4589		3271	3115	1053	2743	2551	1943	6376
4902	9575	1694	2409	942	10100	2501		1889	5153	2353	1694	1942	2130	2851
2461	9824	1169	3557	1012	11000	3434		857	4635	3461	1733	2089	2343	4435
9654	4640	1307	4620	992	8836	4736		2461	1351	803	2497	1946	2083	6097
4393	6008	903	11100	1644	4259	3527		1441	1773	1582	7551	3254	1368	7598
5823	2344	755	7054	1192	3495	4429		2095	1651	3139	2742	1964	1418	4452
12200	3146	1471	4418	1033	15100	5115		3553	7004	2493	1880	2200	2071	4700
8811	5824	1468	8343	1256	4490	1601		2043	6696	2092	4350	1926	839	2163
6301	4725	614	4642	1590	4352	3888		1987	2061	1403	2973	3519	1160	5287
3383	4209	1082	2878	1143	4581	2638		1575	2736	3686	1635	1300	2440	2413
3090	9225	1372	6268	1132		4241		1350	1568	3625	4533	2596		4766
5218	3310	1167	1267	1000		5730		2785	1604	1508	994	1844		7345
6272	4953	1137	3391	1425		2659		1590	2795	2556	2135	1729		3826
5768	4416	951	2511	1943		2539		1563	4574	1278	1224	2696		3231
3859	2931	2276	15200	1445				1533	2039	1109	3569	2545
1509	3536	2307	5332	1264				774	6074	792	1418	2512
2075	1714	1011	4839	2531				894	1501	1694	3227	5863
5969	928	1314	3966	2244				1522	4137	1866	3729	3690
2890	5264	743	4978	2377				1189	1378	1271	2022	5818
2951	3067	840	5207	1789				1486	1070	5018	3149	3234
2789	3017	640	4987	1108				1001	2287	4619	2807	2118
3162	1341	1075	2883	1022				1415	1238	3346	2464	1675
3089	6724	1123	6678	1984				1511	811	1155	3168	2104
5512		881	5544	1265				1388	1826	4473	4051	1956
2756		1667	4837	1729				701	1914		2778	3042
3940		1571	3560	1958				1891	1917		2863	3255
6636		1619	3088	1387				3398	954		2484	3765
4203		794	7122	4874				3308	2977		3064	10500
3685		2482	7114	1461				1294			3784	3238
5590			7029	1555				1475			3608	1774
14900								4122
13700								6544
20600								5653
17900								4412
8509								5802
4838								1555
4401								2331
14900								4560
12900								3179
15200								5560
14100								6044
13000								5117
12800								4441
9669								2520
15700								4867
24700								15200
6661								2401
3481								1238
15100								4364
9285								6336
13600								2049
12800								4089
10000								5699
21100								5119
14600								5774
10500								4480
22300								6675
16300								4754
15200								5125
23900								8575
13300								5081
9465								2825
15000								4093
18800								6776
5143								1488
8232								1976
16000								4357
11800								3521
9580								2350
8760								1587
13500								3540
14500								4109
16600								3192
7313								2825
24100								6317
28000								12800
17200								3675
26000								8967
13300								4662
8633								2245
4559								1185
16200								5556
10400								3838
6659								2127
7260								1918
6527								1521
7498								1489
7892								1127
2329								3628
7293								2039
8050								3063
9237								2561
7376								1606
11300								3959
3316								864
9258								3716
5361								1450
6147								1889
5954								1566
8844								3296
2285								2125
9156								2419
10700								3423
9350								1796
7260								2147

## Sheet: Figure 6E
YFP-VAP Intensity in IncV Object						YFP-VAP Intensity in Cytosol
WT VAP		VAP K50L				WT VAP		VAP K50L
WT	F263A Y287A	WT	Y287A	T265A		WT	F263A Y287A	WT	Y287A	T265A
5600	1719	4045	4385	4423		2547	2491	2328	6487	3982
9625	1551	7432	1349	3826		2434	3922	3719	1618	3378
7067	3261	3028	1898	1714		1319	7449	1757	3778	1404
5743	1007	3818	2492	5049		2996	2218	3826	3423	4018
14200	2437	4605	4106	3895		5509	4396	1192	5154	3502
9652	937	3988	1016	3168		5359	1604	2449	1188	3564
5161	1587	3902	4911	1752		1725	2568	4059	6797	1393
10900	1682	1425	3549	5592		5469	3498	1144	4981	2933
4573	1588	1772	3737	2934		1107	3966	1493	4920	2673
6736	838	1480	911	4396		2865	1056	865	1055	3563
3763	1085	1518	3154	2339		3359	1533	1427	5220	1985
2738	1218	6666	4057	1849		961	1940	3053	7157	1978
4223	2332	4620	3521	2477		1367	3148	2484	3787	2923
6900	1836	4110	2115	4870		1510	3647	3426	2950	3909
3543	943	3496	997	2552		1811	1076	4004	1111	2019
4726	2371	3744	3513	1291		2421	4493	3139	4533	1319
4432	1234	2933	3127	3236		1823	1582	1885	3649	3647
13900	1666	2203	1465	4444		4345	2724	2145	2757	3769
10400	2063	1898	2207	1092		3304	2393	1496	4425	1066
5697	2001	4324	1598	4231		1718	3103	4024	1655	5043
8566	1863	4426	2591	3966		1987	4126	3421	2972	3629
10700	940	3324	5369	4027		5117	1445	3636	5150	3430
6926	2350	4352	2585	1912		2480	4709	3046	3551	2467
5994	2582	4126	1100	2282		1908	4454	3443	1969	2361
10400	2936	4055	5103	1205		3217	5260	3650	7258	902
5386	3370	3844	3552	4569		2193	6178	3324	5248	3437
2335	1241	4070	4019	6133		846	1003	2361	5382	5259
12900	2175	9278	1502	4437		2950	2637	8131	2147	5076
11200	2794	6929	1565	4464		2479	5161	4703	3822	4424
10800	1244	2812	2562	2342		3544	2268	2283	3109	4673
11200	868	5629	4260	4951		2784	986	3776	6093	2815
9179	888	1806	2581	6143		2701	1330	1590	3628	5994
13100	1830	4029	921	5577		4058	4238	3159	1333	4862
20800	1272	1545	5616	4188		7950	2773	1671	9405	2691
19900	1836	6136	3049	3501		3735	4527	2594	4371	2941
20500	2037	1770	3235	2252		4473	4015	1205	4068	1821
8038	783	4183	1510	1455		2559	907	1810	1607	1515
5556	1733	3820	971	3818		1468	2927	2462	1252	2730
9980	1193	2928	1432	2575		2003	1793	1718	2255	2795
9090	940	5568	2339	1912		3002	1556	4758	3697	1614
9914	1073	2359	1849	2101		2011	1652	2075	1662	2215
11100	994	4569	1381	5461		3160	1330	3841	2000	3845
9998	1150	2607	1687	2206		4013	2263	2414	1988	1369
9142	2175	4699	3773	2524		1414	5289	3051	6370	1973
16600	3242	8248	1017	2292		2885	5526	4819	977	2001
10300	1568	1501	2076	4564		2175	2548	1015	1577	2554
5333	2321	2089	2716	3017		1853	4598	1165	2411	1965
7855	969	4642	2433	5026		2966	1037	3459	1975	4659
6621	1183	1719	2128	2443		2164	1516	1500	2220	1934
16400	1007	2041	5679	4740		5221	1462	1401	8921	3731
11800	2084	3195	1891	1222		3474	3132	2513	2565	1273
8597	1536	2676	1551	6156		1705	2899	2455	2476	3816
4457	4214	14400	2346	6775		1569	7412	7235	2673	5091
18900	2679	8957	1546	7843		3644	3968	7137	1878	6160
21300	3266	4051	1695	7740		6958	3772	2878	2569	5963
14700	4332	9611	6930	4847		5090	7266	4255	8131	3354
9045	1558	8729	3943	2988		2190	1801	5574	4355	2323
4506	875	5953	3762	5326		1089	1355	3785	5504	3552
7110	2107	8589	2157	2930		2561	2900	4660	3301	3850
10600	1906	4441	1704	4562		2503	2860	2300	2316	3881
24600	1436	3188	1378	9302		8577	2068	2296	1907	5618
16700	1487	8855	2362	5992		2575	2527	4186	1421	4627
9427	2075	6296	4244	2910		4500	937	2200	5049	2850
13900	3824	9126	1435	4845		5656	7804	5623	1384	4202
11800	2614	6031	2997	6769		5344	5570	3785	3023	6580
23300	3880	4269	2332	4577		10000	6103	4594	2939	3923
17000	1751	3814	2992	1953		4256	3191	1365	3894	1929
6407	2735	12800	2010	3384		1112	6245	8185	3756	2702
13700	1326	24900	2919	3076		6941	2016	7875	2858	2054
4156	4595	7326	5964	3129		5190	9623	3407	6572	1167
9917	1251	5147	5053	5103		4381	1447	3321	4548	4904
7054	1245		2657	4315		1654	2019		2625	3849
	2013						2844

## Sheet: Figure 6G
YFP-VAP Intensity in IncV Object				YFP-VAP Intensity in IncV Object
WT	S3A	T265D P266A S3A		WT	S3A	T265D P266A S3A
5590	1642	4180		1475	2270	7172
14900	1081	3047		4122	1746	3636
13700	1352	3806		6544	1835	4965
20600	987	3793		5653	1654	4487
17900	1453	3970		4412	1673	2107
8509	1458	3061		5802	2419	3607
4838	1149	12100		1555	2101	4126
4401	954	4982		2331	1197	5084
14900	1349	4101		4560	2233	5096
12900	2397	4076		3179	3115	1683
15200	1597	2208		5560	2347	1778
14100	1205	3254		6044	1479	5468
13000	1373	5564		5117	1254	4100
12800	815	5052		4441	952	4360
9669	789	5721		2520	1313	5522
15700	878	4484		4867	890	3562
24700	1084	8573		15200	1306	6527
6661	1265	3132		2401	1217	830
3481	705	3055		1238	926	4008
15100	992	2762		4364	1817	2035
9285	1542	6783		6336	2452	6544
13600	728	3469		2049	997	1955
12800	1143	7039		4089	2095	2487
10000	867	3811		5699	1342	2738
21100	970	6181		5119	1374	6518
14600	1129	2828		5774	1840	1413
10500	3129	5061		4480	3998	5136
22300	1122	5190		6675	971	6784
16300	935	8875		4754	918	6235
15200	1340	3403		5125	1409	5520
23900	1349	5747		8575	1537	4868
13300	2299	2874		5081	2821	5840
9465	1441	2502		2825	1359	2472
15000	991	6213		4093	1171	3241
18800	3682	3635		6776	4372	4481
5143	1702	2675		1488	2123	2953
8232	2282	10900		1976	3133	5141
16000	2783	5060		4357	4922	4358
11800	1582	8707		3521	2156	3508
9580	924	2693		2350	884	2206
8760	2116	6877		1587	3130	4036
13500	4261	6501		3540	8553	6501
14500	4518	2572		4109	3636	2863
16600	1918	18100		3192	1712	5510
7313	870	4747		2825	1351	2109
24100	976	5365		6317	1256	4024
28000	948	10600		12800	1107	3377
17200	1944	9276		3675	1815	3309
26000	2031	2354		8967	3268	2678
13300	1388	3858		4662	1885	3822
8633	1230	4279		2245	1354	4011
4559	974	2804		1185	1151	1518
16200	2172	3418		5556	2701	3718
10400	2209	1448		3838	2718	1690
6659	1412	2385		2127	1828	2260
7260	1383	3777		1918	1361	2482
6527	1350	3793		1521	1582	2212
7498	852	1806		1489	870	949
7892	3232	2004		1127	3350	1972
2329	1214	2413		3628	1229	2683
7293	1344	2765		2039	1747	2828
8050	921	2809		3063	1051	2590
9237	872	3510		2561	1044	1786
7376	1958	3279		1606	2194	1765
11300	967	4074		3959	1165	1170
3316	1390	7596		864	879	3560
9258	1759	4303		3716	1809	4064
5361	4485	2314		1450	4637	3188
6147	4751	3197		1889	7341	2199
5954	1964	2994		1566	780	1791
8844	2242	3782		3296	998	885
2285	2232	3029		2125	2154	3535
9156	1464	4480		2419	787	4827
10700	1703	3076		3423	834	1788
9350		1391		1796		653
7260		2324		2147		1715
1800				747
2400				1121
2494				1876
1288				974
1214				874
3202				904
1640				594
2205				690
1469				787
1259				645
1099				657
1153				617
3147				1467
1558				756
2491				1140
1249				713
1085				810
1695				783
967				622
1178				688
1549				913
1292				855
1136				690
2391				816
2227				897
1583				727
3311				888
2385				902
1428				608
1099				639
1554				889
1689				889
1346				596
1622				593
2292				1147
938				775
1611				875
1801				914
1613				786
1222				681
1336				758
1559				706
897				603
1794				675
1359				617
5931				1528
1187				724
1706				1037
1311				662
2814				741
1377				674
1928				1119
2309				1264
3296				1462
1331				665
1872				699
1197				815
902				530
1261				678
1299				651
2005				777
1519				827
1606				789
1746				710
1203				609
3247				1010
2865				979
2782				908
2046				1190
1318				724
1907				741
1580				735
