# Supplementary material for: Phosphoregulation accommodates Type III secretion and assembly of a tether of ER-Chlamydia inclusion membrane contact sites
Source: eLife. 2022 Jul 15;11:e74535. doi: 10.7554/eLife.74535 (PMC9286742; doi:10.7554/eLife.74535)
Supplement: Figure 7—figure supplement 1—source data 1. [file elife-74535-fig7-figsupp1-data1.xlsx]

## Sheet: Figure 7S1
IncV Volume				Inclusion Volume
WT	F263A Y287A	S/A		WT	F263A Y287A	S/A
29.4	25.3	34.2		124	183	97.8
22.9	18	18.6		168	123	83.2
1.42	14.9	24		22.5	120	129
26.7	16.9	28.6		110	76.9	147
8.08	29.3	3.44		64.2	139	29.7
24.7	12.1	30.7		93.2	54.7	132
8.82	12	39.7		58.7	68.9	292
10.9	9.75	3.51		68.3	63	42.1
3.17	38	0.637		47.9	147	17.1
1.98	19.2	6		16.3	110	37.4
1.59	10.2	8.75		30.9	45.2	67.2
22	32	7.78		79.3	133	31.2
15	14	10.2		66.2	155	70.9
4.45	5.55	13.3		33.3	35.6	74.1
14	10.1	24.4		87.1	137	126
2.17	16.8	10.3		34.3	144	47.6
14.2	29.3	24.9		129	131	188
4.29	12	6.1		32.6	117	55.3
11.1	21.5	17.8		50.8	166	152
14.1	15.2	11		70.7	139	137
5.02	11.9	7.83		45.4	129	37.4
15.6	7.45	15.8		85.4	67.5	98.7
5.93	10.2	10.2		48.5	48.1	61.6
23.4	1.31	19.9		71.6	22.4	131
1.32	36.3	12.3		27.2	122	81.1
14.6	32.1	11.8		187	350	105
2.09	44.1	16.7		45.1	525	117
19.2	0.53	18.8		107	16.5	115
9.54	4.72	14.7		43.5	46.9	77.4
13.3	26.7	14.3		166	208	75.1
26.9	20.8	13.1		127	198	78.8
11.4	23.3	4.2		83.8	93.1	26.3
10.5	14.8	2.69		62.3	158	20.3
1.03	11.7	24.1		23.7	79.4	120
20.4	14.5	0.366		116	108	72.5
6.25	14.7	5.93		77.3	91.1	34.2
16	11	17.4		69.2	67.7	97.7
4.44	13.3	14.5		42.3	58.2	91.6
14.4	5.72	5.52		63.6	29.5	44.3
4.42	12	0.962		140	70.6	26.8
7.6	8.24	21.4		94.1	43.8	674
9.94	3.4	16.7		61.7	25.2	81.6
29.5	10.2	30.3		146	77.6	135
10.2	7.1	22.2		76	42.7	187
28.3	17.7	1.65		121	67.3	23.5
2.57	20	30		40.4	117	202
11.5	13.6	18.2		51.9	123	94.5
19.5	10.5	12.6		71.8	56.8	81.9
3.85	11	10		29.5	53.7	152
3.48	25.4	1.91		52.8	107	18.4
9.45	12.8	5.69		122	57.4	72.4
5.62	19.3	9.72		55.2	155	55.6
10.3	15.6	9.73		77.1	49.1	56.9
19.4	32	2.57		109	229	78.7
12.3	12.2	12.8		93.7	49.9	72.1
6.79	15	1.25		44	102	25
2.92	8.28	27.8		62.5	46	231
11.2	13.2	22.1		70.7	62.5	106
8.07	0.885	20.8		156	13.6	251
19.8	3.19	2.53		81.6	31	53.9
49.6	7.78	24.2		123	35.2	205
8.64	23.3	2.12		43.9	137	20.1
12.5	15.9	16.2		77.5	83	48
13.9	15.8	13.9		36.3	216	93.3
8.7	0.909	0.735		299	24	11.5
15.8	12.4	14.4		94.7	121	91.7
1.68	17.2	30		40.5	143	138
8.76	2.13	6.74		88.1	65.1	58.6
3.16	17.8	35.7		25.4	101	241
2.63	14.6	8.23		50.2	72.8	53.1
12.8	18	2.62		133	104	26.9
17.5	13.1	42.9		58.7	81	123
2.22	35.4	9.26		31.4	153	58.7
13.1	18.7	6.11		59.5	68.8	29.1
1.38	25.9	2.34		24	145	29.3
7.26	5.61	10.4		104	47.6	73
20.7	5.43	0.393		85.9	54.5	34.6
2.7	7.14	4.67		193	58.3	19.9
17.1	20.9	19.2		75.4	95	58.6
2.51	5.84	3.25		19.2	31.4	41.3
6.32	10	7.48		59.4	50.1	39.9
16.3	5.29	13.1		84.4	36.7	114
5.45	16	3.26		55	114	27.9
10.7	7.54	10.7		83.8	40	40.9
17.1	2.72	3.72		73.9	25.4	40.2
12.1	25.4	0.993		146	236	14.1
17.6	28.4	3.53		90.9	143	40.1
6.54	11.3	10.7		33.5	45.2	36
3.97	17.1	6.09		27	184	36
34.2	14.3	6.84		133	99.9	38.3
