# Supplementary material for: Phosphoregulation accommodates Type III secretion and assembly of a tether of ER-Chlamydia inclusion membrane contact sites
Source: eLife. 2022 Jul 15;11:e74535. doi: 10.7554/eLife.74535 (PMC9286742; doi:10.7554/eLife.74535)
Supplement: Figure 7—figure supplement 2—source data 1. [file elife-74535-fig7-figsupp2-data1.xlsx]

## Sheet: Figure 7S2B
YFP-CK2b Intensity in IncV Object				YFP-CK2b Intensity in Cytosol
WT	F263A Y287A	S/A		WT	F263A Y287A	S/A
1086	2608	1292		770	622	826
4557	1179	2912		2442	637	2444
1744	4493	1774		1932	727	851
1696	2688	6936		1251	596	3483
1301	6482	2894		1483	2398	654
1494	5179	3826		991	884	713
979	1950	1676		722	730	1067
1820	3123	2144		1307	664	788
1688	1657	1654		810	607	676
4225	894	1683		778	560	1517
2740	1107	2801		718	625	631
1431	2661	5770		998	963	1754
2643	3361	2941		740	615	696
1373	4329	3868		684	3332	651
2063	1804	3325		632	673	1169
1630	4616	3086		607	1458	822
2971	6209	1502		1019	1787	945
1157	5822	6331		738	2058	2279
3113	1108	3736		1200	662	715
2689	3408	2180		1024	1409	703
1775	3281	1928		2682	1612	1001
1091	3693	2129		891	1613	1056
752	2270	4493		816	1215	1385
1789	2237	2753		1240	1045	1452
2189	2987	1066		2376	1677	688
786	6009	2843		716	1359	1215
1211	14200	2090		1108	7446	1723
2144	2545	2062		2612	835	721
1322	2793	1330		1275	714	1028
662	2621	1186		650	1021	791
1350	9843	1968		900	3733	1022
1189	18700	2812		727	5007	2510
1659	6824	2114		970	4327	1502
1267	2833	1751		858	1021	973
1457	1856	1418		1047	683	773
2238	2418	1376		2238	803	892
2318	3646	1363		905	988	904
2062	15700	1331		1026	4661	811
2401	2414	1627		2235	662	645
707	6286	1362		587	1252	902
6012	3556	3096		7573	1462	1951
5682	1539	1761		5434	603	753
4968	9756	2657		4140	3686	1893
1781	3093	13400		1137	794	12200
3165	3925	3035		2167	1164	1552
5806	6956	3831		1625	3586	1248
2494	5329	2132		1425	2062	1160
2934	5489	13400		1503	2971	5963
2362	4408	19500		2354	1744	5707
1290	9978	3863		821	9667	1177
3654	3362	5096		2183	745	1222
1994	2950	7286		1458	1160	4161
5451	1823	6702		3372	803	5859
2733	5429	2784		1124	2014	1177
3562	4441	3965		1942	786	2287
2213	2842	4440		1380	5047	1892
3598	4335	3326		2174	1497	1021
2969	3594	13500		2995	1102	9221
2840	3123	3434		3499	1012	1480
1999	4281	2377		2110	1718	1089
