# Supplementary material for: Phosphoregulation accommodates Type III secretion and assembly of a tether of ER-Chlamydia inclusion membrane contact sites
Source: eLife. 2022 Jul 15;11:e74535. doi: 10.7554/eLife.74535 (PMC9286742; doi:10.7554/eLife.74535)
Supplement: Figure 7—source data 1. [file elife-74535-fig7-data1.xlsx]

## Sheet: Figure 7C
YFP-VAP Intensity in IncV Object				YFP-VAP Intensity in Cytosol
WT	F263A Y287A	S/A		WT	F263A Y287A	S/A
1325	1261	991		612	2120	1190
2664	646	975		739	804	1290
1690	702	924		547	862	1320
1423	641	795		516	724	821
1705	956	789		840	800	862
2198	814	780		1013	655	909
2639	853	716		896	1413	959
1809	987	1122		1415	1924	2152
1222	777	749		587	1279	792
3734	1079	715		841	1164	940
4202	774	1019		1688	1029	1931
2857	775	1231		819	905	1806
1288	680	1857		948	886	1039
1283	611	1137		504	719	716
5729	749	807		1488	775	829
4160	1163	1067		1186	2194	1114
2250	1196	1013		780	2040	977
3617	861	805		1165	1574	1109
3251	688	717		1064	1014	1239
2028	827	2166		889	1021	798
3622	836	920		1252	867	1140
2019	905	2625		851	1479	2748
1234	1071	1022		1781	1026	901
1616	614	1701		784	873	2271
1233	663	993		1631	646	1292
1823	1124	889		1104	798	934
675	929	606		661	1323	789
3255	974	2216		954	1369	2763
2514	1368	2299		928	1028	2124
893	802	1457		515	824	1762
2945	710	707		1048	806	807
3336	954	689		902	1213	807
2753	611	554		826	742	549
1791	878	687		846	1470	811
4233	898	640		989	1345	810
4641	1122	857		884	1268	1233
1638	770	735		660	1629	820
1675	1056	1001		797	2167	1477
2327	723	617		844	887	789
1917	944	814		612	1381	1252
3725	876	768		1630	1165	1036
1503	619	807		781	764	907
1879	868	706		697	1309	1188
2764	1041	979		707	1094	1776
3039	649	744		1857	768	1342
6063	773	789		1182	727	1200
853	754	743		666	662	1049
5094	690	990		2422	802	1510
2518	752	775		734	1347	1214
4652	648	997		1136	817	1767
1438	1079	737		1443	1720	1073
9264	870	753		1777	1204	910
4270	665	870		1311	840	1159
3516	1179	1559		1047	1634	2712
2134	604	1020		813	827	1054
4939	751	909		1662	1030	1335
3433	660	1163		930	731	1805
6526	590	1397		1439	684	1864
4066	803	1455		930	903	1779
3863	936	821		754	1594	1061
2675	772	810		1078	1313	1288
3890	997	1191		1467	1076	1568
4302	709	1597		1261	935	1620
3450	776	1007		1507	852	1435
3331	1168	802		697	1427	1154
2703	1525	1182		1023	2602	1759
3346	1361	1161		1350	1825	1407
2759	546	687		780	648	1099
1975	932	676		1066	1655	977
1766	817	1103		810	1306	1569
801	771	733		809	962	732
2400	856	694		981	1101	885
1568	786	1804		870	726	1829
3176	1303	841		1077	2072	1362
3886	1312	945		1513	1600	1370
1581	1142	679		647	1680	818
1296	780	927		1031	859	885
2479	954	829		701	1335	1107
1991	1062	800		764	1677	1330
2508	800	778		1253	1231	1030
3043	914	834		737	952	1109
1430	911	1053		841	1560	1650
2982	1018	837		911	2303	1016
2064	1163	629		1388	1097	809
2383	992	1337		707	1467	2155
3896	885	1239		1264	1176	2013
2468	947	1896		708	1402	1765
789	938	1342		530	974	1711
4555	823	1916		1378	1124	2182
1736	883	1087		855	1221	997

## Sheet: Figure 7D
	aMBP (VAP)	Ponceau (GST)
Lane 1	0	2980.65
Lane 2	189.728	1200.99
Lane 3	3586.23	1096.4
