# Supplementary material for: Phosphoregulation accommodates Type III secretion and assembly of a tether of ER-Chlamydia inclusion membrane contact sites
Source: eLife. 2022 Jul 15;11:e74535. doi: 10.7554/eLife.74535 (PMC9286742; doi:10.7554/eLife.74535)
Supplement: Supplementary file 1. [file elife-74535-supp1.xlsx]

## Sheet: Sheet1
Insert:	PCR:	Primer Names:	Primer Sequences:	Template:
CFP-VAP	PCR A	VAPAN1H3	AAGAAGCTTATGGCGTCCGCCTCAGGGGCCATGGCG	pGFP-VAPAWT
		VAPAN1Age	ACCACCGGTGGCAAGATGAATTTCCCTAGAAAG
YFP-VAP	PCR A	VAPAN1H3	AAGAAGCTTATGGCGTCCGCCTCAGGGGCCATGGCG	pGFP-VAPAWT
		VAPAN1Age	ACCACCGGTGGCAAGATGAATTTCCCTAGAAAG
YFP-VAP K50L	PCR A	VAPAN1H3	AAGAAGCTTATGGCGTCCGCCTCAGGGGCCATGGCG	pYFP-VAPAWT
Constructed by overlapping PCR		VAPA K50L 3	GTAGTCTTCACTAGGAAACACAC
	PCR B	VAPA K50L 5	GTGTGTTTCCTAGTGAAGACTAC	pYFP-VAPAWT
		VAPAN1Age	ACCACCGGTGGCAAGATGAATTTCCCTAGAAAG
	PCR C	VAPAN1H3	AAGAAGCTTATGGCGTCCGCCTCAGGGGCCATGGCG	PCR A + PCR B
		VAPAN1Age	ACCACCGGTGGCAAGATGAATTTCCCTAGAAAG
MBP-VAPMSP	PCR A	VAPAATG Not 5	GCGGGCGGCCGCATGGCGTCCGCCTCAGGGGC	pGFP-VAPAWT
		VAPAMSP Bam 3	GGAGGATCCCTACATTTCAAATACGCATCTC
GST-IncV167-363 WT	PCR A	0260ATG167 Bam 5	GGAGGATCCATGCAAGTTGAGTTAGCTGCCTG	pCMV-IE-N2-IncV-3xFLAG WT
		0260STOP Xho 3	CTCCTCGAGTTATTTACGAGAGGGTTTCTTCTTTTG
GST-IncV167-363 S3D	PCR A	0260ATG167 Bam 5	GGAGGATCCATGCAAGTTGAGTTAGCTGCCTG	pCMV-IE-N2-IncV S345,346,350D -3xFLAG
		0260STOP Xho 3	CTCCTCGAGTTATTTACGAGAGGGTTTCTTCTTTTG
GST-IncV167-363 S/D	PCR A	0260ATG167 Bam 5	GGAGGATCCATGCAAGTTGAGTTAGCTGCCTG	pCMV-IE-N2-IncV ncATcAT-DD -3xFLAG
		0260STOP Xho 3	CTCCTCGAGTTATTTACGAGAGGGTTTCTTCTTTTG
GST-IncV167-363 T265D P266A	PCR A	0260 ATG 167 Bam 5	GGAGGATCCATGCAAGTTGAGTTAGCTGCCTG	p2TK2SW2 mCh(Gro) TetR TetAP CTL0260 3xFLAG IncDTerm
Constructed by overlapping PCR		IncV T265D P266A 3	CGGACAGTTCTTTATCGCTATTTGGTGCGTCGTGGAAGCTAGAAG
	PCR B	IncV T265D P266A 5	CTTCTAGCTTCCACGACGCACCAAATAGCGATAAAGAACTGTCCG	p2TK2SW2 mCh(Gro) TetR TetAP CTL0260 3xFLAG IncDTerm
		0260 STOP Xho 3	CTCCTCGAGTTATTTACGAGAGGGTTTCTTCTTTTG
	PCR C	0260 ATG 167 Bam 5	GGAGGATCCATGCAAGTTGAGTTAGCTGCCTG	PCR A + PCR B
		0260 STOP Xho 3	CTCCTCGAGTTATTTACGAGAGGGTTTCTTCTTTTG
Tet-IncV-3xFLAG 1-356	PCR A	TetR STOP 5 Kpn	GGTGGTACCTTAAGACCCACTTTCACATTTAAG	p2TK2SW2 mCh(Gro) TetR TetAP CTL0260 3xFLAG IncDTerm
Constructed by overlapping PCR		0260 1-356 3	CATGGTCTTTGTAGTCcatTTGAGATGAATCGGAAGAGG
	PCR B	0260 1-356 5	CCTCTTCCGATTCATCTCAAatgGACTACAAAGACCATG	p2TK2SW2 mCh(Gro) TetR TetAP CTL0260 3xFLAG IncDTerm
		IncDTerm 3 Not	GCGGGCGGCCGCgtcttaggagctttttgcaatgc
	PCR C	TetR STOP 5 Kpn	GGTGGTACCTTAAGACCCACTTTCACATTTAAG	PCR A + PCR B
		IncDTerm 3 Not	GCGGGCGGCCGCgtcttaggagctttttgcaatgc
Tet-IncV-3xFLAG 1-341	PCR A	TetR STOP 5 Kpn	GGTGGTACCTTAAGACCCACTTTCACATTTAAG	p2TK2SW2 mCh(Gro) TetR TetAP CTL0260 3xFLAG IncDTerm
Constructed by overlapping PCR		0260 1-341 3	CATGGTCTTTGTAGTCcatGTCTTGTCTTTGCTCTTGGTC
	PCR B	0260 1-341 5	GACCAAGAGCAAAGACAAGACatgGACTACAAAGACCATG	p2TK2SW2 mCh(Gro) TetR TetAP CTL0260 3xFLAG IncDTerm
		IncDTerm 3 Not	GCGGGCGGCCGCgtcttaggagctttttgcaatgc
	PCR C	TetR STOP 5 Kpn	GGTGGTACCTTAAGACCCACTTTCACATTTAAG	PCR A + PCR B
		IncDTerm 3 Not	GCGGGCGGCCGCgtcttaggagctttttgcaatgc
Tet-IncV-3xFLAG S3A	PCR A	TetR STOP 5 Kpn	GGTGGTACCTTAAGACCCACTTTCACATTTAAG	p2TK2SW2 mCh(Gro) TetR TetAP CTL0260 3xFLAG IncDTerm
Constructed by overlapping PCR		IncVS345,346,350A 3	GAATCGGAAGATGCTTCCTCATCTGCTGCTTCGCTGCTGTC
	PCR B	IncV S345,346,350A 5	GACAGCAGCGAAGCAGCAGATGAGGAAGCATCTTCCGATTC	p2TK2SW2 mCh(Gro) TetR TetAP CTL0260 3xFLAG IncDTerm
		IncDTerm 3 Not	GCGGGCGGCCGCgtcttaggagctttttgcaatgc
	PCR C	TetR STOP 5 Kpn	GGTGGTACCTTAAGACCCACTTTCACATTTAAG	PCR A + PCR B
		IncDTerm 3 Not	GCGGGCGGCCGCgtcttaggagctttttgcaatgc
Tet-IncV-3xFLAG T265A	PCR A	TetR STOP 5 Kpn	GGTGGTACCTTAAGACCCACTTTCACATTTAAG	p2TK2SW2 mCh(Gro) TetR TetAP CTL0260 3xFLAG IncDTerm
Constructed by overlapping PCR		IncV T265A 3	CAGTTCTTTATCGCTATTTGGTGGTGCGTGGAAGCTAGAAG
	PCR B	IncV T265A 5	CTTCTAGCTTCCACGCACCACCAAATAGCGATAAAGAACTG	p2TK2SW2 mCh(Gro) TetR TetAP CTL0260 3xFLAG IncDTerm
		IncDTerm 3 Not	GCGGGCGGCCGCgtcttaggagctttttgcaatgc
	PCR C	TetR STOP 5 Kpn	GGTGGTACCTTAAGACCCACTTTCACATTTAAG	PCR A + PCR B
		IncDTerm 3 Not	GCGGGCGGCCGCgtcttaggagctttttgcaatgc
Tet-IncV-3xFLAG T265A Y287A	PCR A	TetR STOP 5 Kpn	GGTGGTACCTTAAGACCCACTTTCACATTTAAG	p2TK2SW2 mCh(Gro) TetR TetAP CTL0260 Y287A 3xFLAG IncDTerm
Constructed by overlapping PCR		IncV T265A 3	CAGTTCTTTATCGCTATTTGGTGGTGCGTGGAAGCTAGAAG
	PCR B	IncV T265A 5	CTTCTAGCTTCCACGCACCACCAAATAGCGATAAAGAACTG	p2TK2SW2 mCh(Gro) TetR TetAP CTL0260 Y287A 3xFLAG IncDTerm
		IncDTerm 3 Not	GCGGGCGGCCGCgtcttaggagctttttgcaatgc
	PCR C	TetR STOP 5 Kpn	GGTGGTACCTTAAGACCCACTTTCACATTTAAG	PCR A + PCR B
		IncDTerm 3 Not	GCGGGCGGCCGCgtcttaggagctttttgcaatgc
Tet-IncV-3xFLAG T265D P266A	PCR A	TetR STOP 5 Kpn	GGTGGTACCTTAAGACCCACTTTCACATTTAAG	p2TK2SW2 mCh(Gro) TetR TetAP CTL0260 3xFLAG IncDTerm
Constructed by overlapping PCR		IncV T236A T239A 3	GCTCACTATCTGCAGAATGTGCGGTTGTAGAG
	PCR B	IncV T236A T239A 5	CTCTACAACCGCACATTCTGCAGATAGTGAGC	p2TK2SW2 mCh(Gro) TetR TetAP CTL0260 3xFLAG IncDTerm
		IncDTerm 3 Not	GCGGGCGGCCGCgtcttaggagctttttgcaatgc
	PCR C	TetR STOP 5 Kpn	GGTGGTACCTTAAGACCCACTTTCACATTTAAG	PCR A + PCR B
		IncDTerm 3 Not	GCGGGCGGCCGCgtcttaggagctttttgcaatgc
Tet-IncV-3xFLAG T265D P266A Y287A	PCR A	TetR STOP 5 Kpn	GGTGGTACCTTAAGACCCACTTTCACATTTAAG	p2TK2SW2 mCh(Gro) TetR TetAP CTL0260 3xFLAG IncDTerm
Constructed by overlapping PCR		IncV T236A T239A 3	GCTCACTATCTGCAGAATGTGCGGTTGTAGAG
	PCR B	IncV T236A T239A 5	CTCTACAACCGCACATTCTGCAGATAGTGAGC	p2TK2SW2 mCh(Gro) TetR TetAP CTL0260 Y287A 3xFLAG IncDTerm
		IncDTerm 3 Not	GCGGGCGGCCGCgtcttaggagctttttgcaatgc
	PCR C	TetR STOP 5 Kpn	GGTGGTACCTTAAGACCCACTTTCACATTTAAG	PCR A + PCR B
		IncDTerm 3 Not	GCGGGCGGCCGCgtcttaggagctttttgcaatgc
Tet-IncV-3xFLAG T265D P266A S3A	PCR A	TetR STOP 5 Kpn	GGTGGTACCTTAAGACCCACTTTCACATTTAAG	p2TK2SW2 mCh(Gro) TetR TetAP CTL0260 3xFLAG IncDTerm
Constructed by overlapping PCR		IncV T236A T239A 3	GCTCACTATCTGCAGAATGTGCGGTTGTAGAG
	PCR B	IncV T236A T239A 5	CTCTACAACCGCACATTCTGCAGATAGTGAGC	p2TK2SW2 mCh(Gro) TetR TetAP CTL0260 S345,346,350A 3xFLAG IncDTerm
		IncDTerm 3 Not	GCGGGCGGCCGCgtcttaggagctttttgcaatgc
	PCR C	TetR STOP 5 Kpn	GGTGGTACCTTAAGACCCACTTTCACATTTAAG	PCR A + PCR B
		IncDTerm 3 Not	GCGGGCGGCCGCgtcttaggagctttttgcaatgc
Tet-IncV-3xFLAG S/A	PCR A	TetR STOP 5 Kpn	GGTGGTACCTTAAGACCCACTTTCACATTTAAG	p2TK2SW2 mCh(Gro) TetR TetAP CTL0260 3xFLAG IncDTerm
Constructed by overlapping PCR		0260 ncAT-A 3	GGTGGAGTGTGGAAGCTTGCTGCTGCTGCTGCTGCTGCTGCTGCTGCTTGAGGACTGACAGAAGTTAG
	PCR B	0260 ncAT-A 5	CTAACTTCTGTCAGTCCTCAAGCAGCAGCAGCAGCAGCAGCAGCAGCAGCAAGCTTCCACACTCCACC	p2TK2SW2 mCh(Gro) TetR TetAP CTL0260 3xFLAG IncDTerm
		0260 cAT-A 3	CAAGAGCATCCATATATTCTGCTGCTGCTGCTGCTGCTGCTGCATTCGAGTCGGACAGTTC
	PCR C	0260 cATA-A 5	GAACTGTCCGACTCGAATGCAGCAGCAGCAGCAGCAGCAGCAGAATATATGGATGCTCTTG	PCR A + PCR B
		IncDTerm 3 Not	GCGGGCGGCCGCgtcttaggagctttttgcaatgc
	PCR D	0260 ncAT-A 5	CTAACTTCTGTCAGTCCTCAAGCAGCAGCAGCAGCAGCAGCAGCAGCAGCAAGCTTCCACACTCCACC	PCR B + PCR C
		IncDTerm 3 Not	GCGGGCGGCCGCgtcttaggagctttttgcaatgc
	PCR E	TetR STOP 5 Kpn	GGTGGTACCTTAAGACCCACTTTCACATTTAAG	PCR A + PCR D
		IncDTerm 3 Not	GCGGGCGGCCGCgtcttaggagctttttgcaatgc
Tet-IncV-3xFLAG S/D	PCR A	TetR STOP 5 Kpn	GGTGGTACCTTAAGACCCACTTTCACATTTAAG	p2TK2SW2 mCh(Gro) TetR TetAP CTL0260 3xFLAG IncDTerm
Constructed by overlapping PCR		0260 ncAT-D 3	GGTGGAGTGGGTAAGCTATCATCATCATCATCATCATCATCATCATCTTGAGGACTGACAGAAGTTAG
	PCR B	0260 ncAT-D 5	CTAACTTCTGTCAGTCCTCAAGATGATGATGATGATGATGATGATGATGATAGCTTACCCACTCCACC	p2TK2SW2 mCh(Gro) TetR TetAP CTL0260 3xFLAG IncDTerm
		0260 cAT-D 3	CAAGAGCATCCATATATTCATCATCATCATCATCATCATCATCATTCGAGTCGGACAGTTC
	PCR C	0260 cAT-D 5	GAACTGTCCGACTCGAATGATGATGATGATGATGATGATGATGAATATATGGATGCTCTTG	PCR A + PCR B
		IncDTerm 3 Not	GCGGGCGGCCGCgtcttaggagctttttgcaatgc
	PCR D	0260 ncAT-D 5	CTAACTTCTGTCAGTCCTCAAGATGATGATGATGATGATGATGATGATGATAGCTTACCCACTCCACC	PCR B + PCR C
		IncDTerm 3 Not	GCGGGCGGCCGCgtcttaggagctttttgcaatgc
	PCR E	TetR STOP 5 Kpn	GGTGGTACCTTAAGACCCACTTTCACATTTAAG	PCR A + PCR D
		IncDTerm 3 Not	GCGGGCGGCCGCgtcttaggagctttttgcaatgc
